# Supplementary material
Source: ML conference proceedings conference paper supplement (https://proceedings.neurips.cc/paper_files/paper/2024/hash/6ffdbf064df51857eb802a904aaaba63-Abstract.html)
Supplement: Supplementary file 1 [file 6ffdbf064df51857eb802a904aaaba63-Supplemental-Datasets_and_Benchmarks_Track.pdf]

## A Pretraining details

We present all the training hyperparameters for the supernet (see Section 3.2 too) at different scales in Table 3. We train GPT-S, -M and -L scales for 4, 6 and 8 days, respectively, on 4 Nvidia A100 GPUs. GPT-XL is trained for 6 days across 40 A100 GPUs. As described in Section 3.2, we use the sandwich rule for the supernet training, which accumulates gradients from the smallest, largest and 2 random subnetworks of the supernet in each gradient update step.

| Hyperparameter                      | Value                                         |
|-------------------------------------|-----------------------------------------------|
| <b>Trainer</b>                      |                                               |
| num_gpus                            | 4                                             |
| gradient_clip_val                   | 1.0                                           |
| max_steps                           | 800000                                        |
| precision                           | BFloat16 Mixed precision                      |
| seed                                | 1234                                          |
| <b>Optimizer</b>                    |                                               |
| optimizer                           | AdamW                                         |
| lr                                  | 0.000316                                      |
| weight_decay                        | 0.1                                           |
| betas                               | [0.9, 0.95]                                   |
| eps                                 | 1.0e-09                                       |
| seed                                | 1234                                          |
| <b>Optimizer Parameter Grouping</b> |                                               |
| bias_weight_decay                   | False                                         |
| normalization_weight_decay          | False                                         |
| <b>Scheduler</b>                    |                                               |
| num_warmup_steps                    | 4000                                          |
| num_training_steps                  | 800000                                        |
| decay_factor                        | 0.1                                           |
| schedule                            | cosine                                        |
| <b>Model</b>                        |                                               |
| block_size                          | 1024                                          |
| vocab_size                          | 50254                                         |
| padding_multiple                    | 512                                           |
| scale_embeddings                    | False                                         |
| padded_vocab_size                   | 50254                                         |
| head_size                           | 64                                            |
| lm_head_bias                        | False                                         |
| attn_dropout                        | 0.1                                           |
| resi_dropout                        | 0.1                                           |
| embed_dropout                       | 0.1                                           |
| shared_attention_norm               | False                                         |
| norm                                | LayerNorm                                     |
| rope_condense_ratio                 | 1                                             |
| scale_attn_weights                  | True                                          |
| scale_attn_by_inverse_layer_idx     | True                                          |
| shared_embedding                    | True                                          |
| pos_embedding                       | False                                         |
| rel_pos_enc                         | True                                          |
| rotary_percentage                   | 0.5                                           |
| norm_eps                            | 1e-5                                          |
| rope_base                           | 10000                                         |
| parallel_residual                   | True                                          |
| initializer_range                   | 0.02                                          |
| <b>Data</b>                         |                                               |
| dataset                             | "openwebtext"                                 |
| num_cpu_worker                      | 32                                            |
| batch_size                          | 32(GPT-S), 8(GPT-M), 8(GPT-L), 1(GPT-XL-wide) |
| max_sample_len                      | 1024                                          |
| val_ratio                           | 0.0005                                        |
| val_split_seed                      | 2357                                          |

Table 3: Supernet training hyperparameters.

## B Hardware specifications and Properties

In Table 4, we present details of the 8 GPU devices and 5 CPU devices we used for profiling our 3 search spaces GPT-S, GPT-M and GPT-L. The devices we study capture a wide range of micro-architectures, number of cores and GPU/CPU memory. The considered GPUs capture a wide range of inference latencies and throughput <sup>9</sup>.

Table 4: Hardware specifications.

| Platform | Device Name            | Micro Architecture | Number of Cores | Memory        |
|----------|------------------------|--------------------|-----------------|---------------|
| GPU      | NVIDIA RTX 2080        | Turing             | CUDA 2944       | 8GB GDDR6     |
|          | NVIDIA RTX 3080        | Ampere             | CUDA 8704       | 12GB GDDR6X   |
|          | NVIDIA RTX A6000       | Ampere             | CUDA 10752      | 48 GB GDDR6   |
|          | NVIDIA A100            | Ampere             | CUDA 6912       | 40GB HBM2e    |
|          | NVIDIA A40             | Ampere             | CUDA 10752      | 48GB GDDR6    |
|          | NVIDIA Tesla P100      | Pascal             | CUDA 3584       | 12GB HBM2     |
|          | NVIDIA Tesla V100      | Volta              | CUDA 5120       | 24GB GDDR6    |
|          | NVIDIA H100            | Hopper             | CUDA 16896      | 80GB HBM3     |
| CPU      | AMD 7452               | Zen2               | CPU Core 32     | Cache 128 MB  |
|          | AMD 7513               | Zen3               | CPU Core 32     | Cache 128MB   |
|          | AMD 7502               | Zen2               | CPU Core 32     | Cache 128MB   |
|          | Intel Xeon Silver 4114 | Intel P6           | CPU Core 10     | Cache 13.75MB |
|          | Intel Xeon Gold 6242   | Intel P6           | CPU Core 16     | Cache 22MB    |

## C Surrogate models

In this section, we provide details of the latency and energy surrogate predictors used in HW-GPT-Bench. The surrogates are trained and evaluated on 8000 and 2000 fixed architectures, respectively.

### C.1 PPL Surrogates

**Data collection.** We subsample 10% from the OpenWebText training set and use that as a validation set to compute the perplexity and accuracy metrics of architectures in the supernet, that inherit the trained supernet weights. The time to collect the perplexity pairs for 10k architectures was 8, 16, 24 and 32 days on 4 A100 GPUs for GPT-S, -M and -L and -XL-wide, respectively. Note that this computation is trivial to parallelize, as all architectures can be evaluated independently of each other, given the pretrained supernet weights. Afterwards, the  $(x, y)$  pairs, where  $x$  is the one-hot encoded architecture and  $y$  the corresponding perplexity value, are used to train an MLP (Multi Layer Perceptron) using the MSE loss to predict the perplexity on unseen (test) architectures.

**Surrogate Architecture.** The MLP contains 4 linear layers with hidden dimension of 128 and output dimension of 1 (the perplexity prediction). We use ReLU activations at every layer. The dimension of the one-hot encoding is 3 (3 choices for layers) + 3 (3 choices for embedding dimension) +  $\text{max\_layers} \times 3$  (3 choices for number of heads for every layer) +  $\text{max\_layers} \times 3$  (3 choices for MLP ratio for every layer). We train the MLP for 4000 epochs using the Adam optimizer with a learning rate of  $10^{-3}$  and a batch size of 1024.

### C.2 Hardware Surrogates

We now describe the different surrogates we study to model uncertainties in energy and latency prediction. Each of the surrogates is trained to predict mean and standard deviation of energy or latency predictions of a given architecture. For FLOPs, memory and number of parameters, we compute and predict a single observation per architecture. We use 8000 architectures for training our surrogates and 2000 to test the performance and calibration properties of our surrogates.

<sup>9</sup>GPU benchmark

**Data collection.** We measure energy and latency pairs across different devices multiple times to capture the noise in the energy and latency profiling. Additionally, we also profile hardware metrics like Floating Point Operations (FLOPs), Memory consumption (Float16 and BFloat16) and number of parameters for an architecture. Specifically, for every architecture, we compute 50 observations per architecture for energies on GPU and 10 observations for energies on CPU. Similarly, we compute 10 observations per architecture for latencies on both CPUs and GPUs. We use 8 CPU cores (per GPU) for all the latency and energy evaluations.

**AutoGluon.** AutoGluon simplifies the process of developing, training, and deploying machine learning models by automating key tasks such as feature engineering, model selection, and hyperparameter tuning. AutoGluon has two major components. First one is Bagging (bootstrap aggregation) on wide varieties of models like decision trees, random forests, nearest neighbors, linear models and neural networks. Second one is stacking, where predictions of models on the first level are fed as input to models at the next level. We use an AutoGluon model per metric (latency or energy) with `dynamic_stacking = False`, `num_stack_levels = 1`, `number_of_bag_folds = 8` and `number_of_bag_sets = 4`. The input feature map to the model is simply a concatenation of chosen hyperparameters with choices for MLP ratio and number of heads set to -1 when a particular layer is not selected. We train two AutoGluon predictors, one to predict mean, and one to predict the standard deviation of the ground truth latency or energy measurements.

**Ensemble (XGB).** We use an ensemble of 27 Extreme Gradient Boosting (XGB) models with different hyperparameter combinations. Specifically, the models in the ensemble contain a cross product of `n_estimator` choices from [200, 500, 800], `depth` choices from [5,9,3] and `learning_rate` choices from [0.01,0.1,1.0]. We then fit this ensemble, and predict the mean and standard deviation values for the metric at hand by aggregating the predictions of different models using bagging.

**Ensemble (LightGBM).** We use an ensemble of 36 Light Gradient Boosting Machine (LightGBM) models with different hyperparameter combinations. Specifically, the models in the ensemble contain a cross product of `n_estimator` choices from [200, 500, 800], `depth` choices from [5,9,3] and `learning_rate` choices from [0.01,0.1,0.001,1.0]. We then fit this ensemble, and predict the mean and standard deviation values for the metric at hand by aggregating the predictions of different models using bagging.

**Ensemble (MIX).** In addition to ensembles based on XGB and LightGBM, we also fit an ensemble containing a mixture of different machine learning models. Specifically, this ensemble contains 4 XGB and LightGBM regressors (default: [`n_estimators = 500,max_depth = 5,learning_rate = 0.01`],[`n_estimators = 800,max_depth = 3,learning_rate = 0.1`],[`n_estimators = 200,max_depth = 9,learning_rate = 1`]), as well as LinearRegression, Ridge and RandomForestRegressor from sklearn with their default hyperparameters.

### C.3 Memory Surrogate.

We model the memory consumption using a simple MLP (similar to perplexity). The MLP has 4 layers with a hidden dimension of 128 and uses ReLU activations. The input to the MLP is the normalized feature map corresponding to the concatenation of the architecture parameters. The MLP is trained using Adam, with learning rate of  $10^{-4}$  and a batch size of 1024, for 4000 epochs.

## D Accuracy and Calibration of Surrogate models

In this section we provide a more detailed description on the metrics we used to evaluate our surrogate models in Section 3.3, as well as additional results that complement results shown in Table 2 and Figure 4.

### D.1 Accuracy and Calibration Metrics

Given a finite dataset  $D = \{(x_i, y_i)_{i=1}^N\}$  and a regression model that predicts the mean value  $\hat{y}$ , we use standard accuracy metrics:

**Root Mean Squared Error (RMSE):**  $RMSE = \sqrt{\frac{1}{N} \sum_{i=1}^N (\hat{y}_i - y_i)^2}$

**Mean Absolute Error (MAE):**  $MAE = \frac{1}{N} \sum_{i=1}^N |\hat{y}_i - y_i|$

**Median Absolute Error (MDAE):** Median of the absolute differences between predicted and actual values, in ascending order.

$$MDAE = med(\{|\hat{y}_i - y_i|\}_{i=1}^N)$$

**Mean Absolute Percentage Relative Deviation (MARPD):** A similar metric to MAE but scaled by the sum of the absolute values of predicted and actual values. This scaling can be beneficial when dealing with a wider range of values, especially when the predicted or actual values are very close to zero.

$$MARPD = \frac{1}{N} \sum_{i=1}^N \left| \frac{2 \cdot (\hat{y}_i - y_i)}{|\hat{y}_i| + |y_i|} \right| \cdot 100$$

**Coefficient of Determination ( $R^2$ ):** Tells us about the proportion of variance in the dependent variable ( $y$ ) explained by the independent variable ( $x$ ) through the model. Denoting by  $\bar{y} = \frac{1}{N} \sum_{i=1}^N y_i$  the mean of the ground truth data,  $R^2$  is defined as:

$$R^2 = 1 - \frac{\sum_{i=1}^N (\hat{y}_i - y_i)^2}{\sum_{i=1}^N (\bar{y} - y_i)^2}$$

**Correlation Coefficient:** The Pearson correlation coefficient ( $r$ ) measures the strength and direction of the linear relationship between predicted values ( $\hat{y}_i$ ) and actual values ( $y_i$ ) of the data. It ranges from -1 to 1.

$$r = \frac{\sum_{i=1}^N (\hat{y}_i - \bar{y})(y_i - \bar{y})}{\sqrt{\sum_{i=1}^N (\hat{y}_i - \bar{y})^2 \sum_{i=1}^N (y_i - \bar{y})^2}}$$

**Root Mean Squared Calibration Error (RMS Cal.):** A metric used to evaluate the calibration of probabilistic predictions in regression models, particularly in the context of uncertainty quantification. It measures the discrepancy between predicted and observed quantiles. For a model to be well-calibrated, the proportion of observations below a given predicted quantile should match the quantile value. For example, the 90th percentile prediction should contain the true outcome 90% of the time. RMS Cal. is computed as the root mean square of the difference between the predicted quantile levels and the observed frequencies over all quantiles:

$$RMS \text{ Cal.} = \sqrt{\frac{1}{K} \sum_{k=1}^K (P(Y \leq Q_k) - q_k)^2},$$

where  $Q_k$  is the  $k$ -th predicted quantile,  $q_k$  is the corresponding quantile level, and  $P(Y \leq Q_k) = \frac{1}{N} \sum_{i=1}^N \mathbb{I}[y_i \leq Q_k(x_i)]$  is the empirical frequency of the target variables  $Y = \{y_i\}_{i=1}^N$  being less than or equal to  $Q_k$ .  $\mathbb{I}$  stands for the indicator function. A lower RMS Cal. indicates better calibration, reflecting that the predicted uncertainties are accurate and reliable.

**Mean Absolute Calibration Error (MA Cal.):** MA Cal. is computed as the average absolute difference between the predicted quantile levels and the observed frequencies over all quantiles:

$$MA \text{ Cal.} = \frac{1}{K} \sum_{k=1}^K |P(Y \leq Q_k) - q_k|.$$

## D.2 Additional Results on the Accuracy and Calibration of Surrogates

In Tables 5-10 and Figures 9-34 we show additional results that complement results shown in Table 2 and Figure 4.

Table 5: Various performance metrics of surrogates evaluated to predict latencies and energies on GPT-S for different GPUs. The arrow on the side of the metric name indicates if lower or higher is better.

| GPU     | Surrogate      | Accuracy     |             |              |             |              |             |             |             |                  |             |             |             | Calibration |             |             |             |                |             |
|---------|----------------|--------------|-------------|--------------|-------------|--------------|-------------|-------------|-------------|------------------|-------------|-------------|-------------|-------------|-------------|-------------|-------------|----------------|-------------|
|         |                | MAE ↓        |             | RMSE ↓       |             | MDAE ↓       |             | MARPD ↓     |             | R <sup>2</sup> ↑ |             | Corr. ↑     |             | RMS Cal. ↓  |             | MA Cal. ↓   |             | Miscal. Area ↓ |             |
|         |                | latencies    | energies    | latencies    | energies    | latencies    | energies    | latencies   | energies    | latencies        | energies    | latencies   | energies    | latencies   | energies    | latencies   | energies    | latencies      | energies    |
| A100    | AutoGluon      | <b>0.39</b>  | <b>0.03</b> | <b>0.50</b>  | <b>0.28</b> | <b>0.33</b>  | <b>0.02</b> | <b>0.23</b> | <b>5.68</b> | <b>1.00</b>      | <b>0.17</b> | <b>1.00</b> | <b>0.42</b> | <b>0.46</b> | 0.09        | <b>0.40</b> | 0.08        | <b>0.41</b>    | 0.08        |
|         | Ensemble (XGB) | 1.81         | 0.05        | 2.37         | 0.29        | 1.48         | 0.02        | 1.03        | 8.32        | 1.00             | 0.10        | 1.00        | 0.34        | 0.54        | <b>0.08</b> | 0.47        | 0.07        | 0.47           | 0.07        |
|         | Ensemble (LGB) | 8.74         | 0.05        | 10.14        | 0.29        | 8.37         | 0.03        | 5.06        | 9.70        | 0.97             | 0.14        | 1.00        | 0.37        | 0.57        | 0.08        | 0.49        | <b>0.06</b> | 0.49           | <b>0.06</b> |
|         | Ensemble (Mix) | 1.93         | 0.04        | 2.51         | 0.29        | 1.57         | 0.02        | 1.09        | 7.42        | 1.00             | 0.14        | 1.00        | 0.38        | 0.55        | 0.08        | 0.47        | 0.07        | 0.47           | 0.07        |
| A40     | AutoGluon      | <b>0.52</b>  | <b>0.09</b> | <b>0.76</b>  | <b>0.15</b> | <b>0.32</b>  | <b>0.03</b> | <b>0.18</b> | <b>6.16</b> | <b>1.00</b>      | <b>0.93</b> | <b>1.00</b> | <b>0.96</b> | <b>0.35</b> | 0.21        | <b>0.31</b> | 0.18        | <b>0.31</b>    | 0.18        |
|         | Ensemble (XGB) | 3.16         | 0.09        | 4.19         | 0.16        | 2.43         | 0.03        | 1.26        | 6.56        | 1.00             | 0.92        | 1.00        | 0.96        | 0.54        | 0.16        | 0.46        | 0.14        | 0.47           | 0.15        |
|         | Ensemble (LGB) | 14.90        | 0.12        | 17.40        | 0.18        | 14.80        | 0.08        | 6.21        | 11.26       | 0.97             | 0.90        | 1.00        | 0.96        | 0.57        | <b>0.09</b> | 0.49        | <b>0.07</b> | 0.49           | <b>0.08</b> |
|         | Ensemble (Mix) | 3.16         | 0.09        | 4.32         | 0.15        | 2.30         | 0.03        | 1.20        | 6.49        | 1.00             | 0.93        | 1.00        | 0.96        | 0.54        | 0.17        | 0.46        | 0.15        | 0.47           | 0.15        |
| H100    | AutoGluon      | <b>0.18</b>  | <b>0.02</b> | <b>0.25</b>  | <b>0.03</b> | <b>0.14</b>  | <b>0.01</b> | <b>0.23</b> | <b>3.34</b> | <b>1.00</b>      | <b>0.90</b> | <b>1.00</b> | <b>0.95</b> | <b>0.19</b> | <b>0.05</b> | <b>0.17</b> | <b>0.04</b> | <b>0.17</b>    | <b>0.04</b> |
|         | Ensemble (XGB) | 0.76         | 0.02        | 0.99         | 0.03        | 0.61         | 0.01        | 0.98        | 3.57        | 1.00             | 0.90        | 1.00        | 0.95        | 0.48        | 0.05        | 0.41        | 0.05        | 0.42           | 0.05        |
|         | Ensemble (LGB) | 3.45         | 0.02        | 4.02         | 0.04        | 3.34         | 0.02        | 4.44        | 4.64        | 0.97             | 0.87        | 1.00        | 0.95        | 0.55        | 0.18        | 0.48        | 0.16        | 0.48           | 0.16        |
|         | Ensemble (Mix) | 0.77         | 0.02        | 1.00         | 0.03        | 0.64         | 0.01        | 0.99        | 3.50        | 1.00             | 0.90        | 1.00        | 0.95        | 0.47        | 0.05        | 0.41        | 0.05        | 0.42           | 0.05        |
| RTX2080 | AutoGluon      | <b>20.01</b> | <b>0.09</b> | <b>28.40</b> | <b>0.14</b> | <b>11.91</b> | <b>0.07</b> | <b>4.54</b> | <b>6.45</b> | <b>0.98</b>      | <b>0.99</b> | <b>0.99</b> | <b>0.99</b> | <b>0.35</b> | 0.26        | <b>0.29</b> | 0.23        | <b>0.29</b>    | 0.23        |
|         | Ensemble (XGB) | 20.59        | 0.10        | 29.58        | 0.15        | 12.17        | 0.07        | 4.60        | 6.95        | 0.97             | 0.98        | 0.99        | 0.99        | 0.42        | 0.24        | 0.35        | 0.21        | 0.36           | 0.21        |
|         | Ensemble (LGB) | 32.25        | 0.20        | 42.97        | 0.25        | 22.52        | 0.18        | 7.14        | 14.77       | 0.94             | 0.96        | 0.99        | 0.99        | 0.53        | <b>0.05</b> | 0.46        | <b>0.04</b> | 0.46           | <b>0.04</b> |
|         | Ensemble (Mix) | 20.79        | 0.10        | 29.25        | 0.15        | 13.27        | 0.08        | 4.71        | 7.52        | 0.97             | 0.98        | 0.99        | 0.99        | 0.42        | 0.21        | 0.36        | 0.19        | 0.37           | 0.20        |
| RTX3080 | AutoGluon      | <b>6.21</b>  | <b>0.06</b> | <b>8.83</b>  | <b>0.12</b> | <b>3.69</b>  | <b>0.03</b> | <b>1.97</b> | <b>4.10</b> | <b>1.00</b>      | <b>0.96</b> | <b>1.00</b> | <b>0.98</b> | <b>0.43</b> | 0.03        | <b>0.36</b> | 0.03        | <b>0.37</b>    | 0.03        |
|         | Ensemble (XGB) | 7.18         | 0.06        | 10.25        | 0.12        | 4.26         | 0.04        | 2.21        | 4.67        | 1.00             | 0.95        | 1.00        | 0.98        | 0.47        | <b>0.02</b> | 0.41        | <b>0.02</b> | 0.41           | <b>0.02</b> |
|         | Ensemble (LGB) | 22.76        | 0.10        | 27.36        | 0.16        | 21.79        | 0.08        | 7.45        | 8.40        | 0.97             | 0.92        | 1.00        | 0.98        | 0.56        | 0.25        | 0.48        | 0.22        | 0.49           | 0.23        |
|         | Ensemble (Mix) | 7.49         | 0.07        | 10.43        | 0.13        | 5.05         | 0.04        | 2.37        | 4.74        | 1.00             | 0.95        | 1.00        | 0.98        | 0.48        | 0.02        | 0.42        | 0.02        | 0.42           | 0.02        |
| A6000   | AutoGluon      | <b>1.74</b>  | <b>0.05</b> | <b>2.68</b>  | <b>0.06</b> | <b>1.03</b>  | <b>0.04</b> | <b>0.85</b> | <b>5.95</b> | <b>1.00</b>      | <b>0.93</b> | <b>1.00</b> | <b>0.96</b> | <b>0.47</b> | 0.04        | <b>0.40</b> | 0.03        | <b>0.41</b>    | 0.03        |
|         | Ensemble (XGB) | 3.34         | 0.05        | 4.45         | 0.06        | 2.42         | 0.04        | 1.54        | 6.17        | 1.00             | 0.92        | 1.00        | 0.96        | 0.53        | <b>0.02</b> | 0.45        | <b>0.02</b> | 0.46           | <b>0.02</b> |
|         | Ensemble (LGB) | 13.46        | 0.05        | 15.83        | 0.07        | 13.16        | 0.04        | 6.48        | 6.85        | 0.97             | 0.90        | 1.00        | 0.96        | 0.57        | 0.04        | 0.49        | 0.04        | 0.49           | 0.04        |
|         | Ensemble (Mix) | 3.39         | 0.05        | 4.54         | 0.06        | 2.50         | 0.04        | 1.54        | 6.22        | 1.00             | 0.92        | 1.00        | 0.96        | 0.54        | 0.03        | 0.46        | 0.03        | 0.47           | 0.03        |
| V100    | AutoGluon      | <b>7.49</b>  | <b>0.02</b> | <b>10.51</b> | <b>0.14</b> | <b>3.94</b>  | <b>0.01</b> | <b>2.21</b> | <b>2.64</b> | <b>0.99</b>      | <b>0.70</b> | <b>1.00</b> | <b>0.84</b> | <b>0.44</b> | <b>0.36</b> | <b>0.38</b> | <b>0.32</b> | <b>0.39</b>    | <b>0.33</b> |
|         | Ensemble (XGB) | 8.03         | 0.02        | 11.42        | 0.15        | 4.60         | 0.01        | 2.41        | 3.68        | 0.99             | 0.64        | 1.00        | 0.80        | 0.47        | 0.37        | 0.41        | 0.33        | 0.41           | 0.33        |
|         | Ensemble (LGB) | 18.87        | 0.04        | 23.54        | 0.15        | 16.73        | 0.03        | 6.32        | 7.22        | 0.96             | 0.66        | 1.00        | 0.83        | 0.55        | 0.52        | 0.47        | 0.45        | 0.48           | 0.45        |
|         | Ensemble (Mix) | 8.10         | 0.02        | 11.40        | 0.14        | 4.82         | 0.01        | 2.43        | 3.40        | 0.99             | 0.69        | 1.00        | 0.83        | 0.48        | 0.37        | 0.42        | 0.32        | 0.42           | 0.33        |
| P100    | AutoGluon      | <b>3.62</b>  | <b>0.30</b> | <b>5.31</b>  | <b>0.40</b> | <b>2.36</b>  | <b>0.23</b> | <b>0.21</b> | <b>6.13</b> | <b>1.00</b>      | <b>1.00</b> | <b>1.00</b> | <b>1.00</b> | <b>0.24</b> | 0.26        | <b>0.22</b> | 0.23        | <b>0.22</b>    | 0.23        |
|         | Ensemble (XGB) | 22.53        | 0.34        | 31.55        | 0.45        | 16.57        | 0.27        | 1.35        | 7.06        | 1.00             | 1.00        | 1.00        | 1.00        | 0.52        | 0.21        | 0.45        | 0.19        | 0.45           | 0.19        |
|         | Ensemble (LGB) | 140.75       | 0.99        | 160.96       | 1.18        | 144.00       | 1.04        | 9.42        | 22.64       | 0.97             | 0.97        | 1.00        | 1.00        | 0.57        | 0.21        | 0.49        | <b>0.16</b> | 0.49           | <b>0.16</b> |
|         | Ensemble (Mix) | 26.29        | 0.39        | 36.45        | 0.49        | 19.65        | 0.33        | 1.55        | 7.87        | 1.00             | 0.99        | 1.00        | 1.00        | 0.52        | <b>0.18</b> | 0.45        | 0.16        | 0.46           | 0.16        |

Table 6: Various performance metrics of surrogates evaluated to predict latencies and energies on GPT-S for different CPUs. The arrow on the side of the metric name indicates if lower or higher is better.

| CPU         | Surrogate             | Accuracy       |               |                |               |                |               |             |              |                  |             |             |             | Calibration |             |             |             |                |             |
|-------------|-----------------------|----------------|---------------|----------------|---------------|----------------|---------------|-------------|--------------|------------------|-------------|-------------|-------------|-------------|-------------|-------------|-------------|----------------|-------------|
|             |                       | MAE ↓          |               | RMSE ↓         |               | MDAE ↓         |               | MARPD ↓     |              | R <sup>2</sup> ↑ |             | Corr. ↑     |             | RMS Cal. ↓  |             | MA Cal. ↓   |             | Miscal. Area ↓ |             |
|             |                       | latencies      | energies      | latencies      | energies      | latencies      | energies      | latencies   | energies     | latencies        | energies    | latencies   | energies    | latencies   | energies    | latencies   | energies    | latencies      | energies    |
| Xeon Silver | <b>AutoGluon</b>      | <b>1534.66</b> | <b>8.94</b>   | <b>1982.43</b> | <b>11.88</b>  | <b>1242.68</b> | <b>6.52</b>   | <b>3.89</b> | <b>11.69</b> | <b>0.99</b>      | <b>0.91</b> | <b>1.00</b> | <b>0.95</b> | <b>0.14</b> | <b>0.50</b> | <b>0.13</b> | <b>0.43</b> | <b>0.13</b>    | <b>0.43</b> |
|             | <b>Ensemble (XGB)</b> | 1606.20        | 9.14          | 2107.51        | 12.21         | 1297.02        | 6.92          | 4.11        | 12.08        | 0.99             | 0.90        | 0.99        | 0.95        | 0.21        | 0.53        | 0.19        | 0.45        | 0.20           | 0.46        |
|             | <b>Ensemble (LGB)</b> | 3243.75        | 10.09         | 4020.23        | 13.66         | 2833.39        | 8.42          | 9.15        | 14.42        | 0.96             | 0.88        | 0.99        | 0.95        | 0.39        | 0.54        | 0.34        | 0.46        | 0.35           | 0.47        |
|             | <b>Ensemble (Mix)</b> | 1633.05        | 9.05          | 2146.05        | 12.09         | 1285.48        | 6.95          | 4.14        | 11.81        | 0.99             | 0.90        | 0.99        | 0.95        | 0.22        | 0.52        | 0.20        | 0.45        | 0.20           | 0.46        |
| Xeon Gold   | <b>AutoGluon</b>      | <b>1161.51</b> | <b>2.62</b>   | <b>1634.77</b> | <b>3.37</b>   | <b>833.97</b>  | <b>2.08</b>   | <b>6.49</b> | <b>9.40</b>  | <b>0.96</b>      | <b>0.92</b> | <b>0.98</b> | <b>0.96</b> | 0.12        | <b>0.02</b> | 0.10        | <b>0.02</b> | 0.10           | <b>0.02</b> |
|             | <b>Ensemble (XGB)</b> | 1224.12        | 2.69          | 1695.22        | 3.47          | 896.84         | 2.19          | 6.88        | 9.66         | 0.95             | 0.92        | 0.98        | 0.96        | <b>0.06</b> | 0.04        | <b>0.05</b> | 0.04        | <b>0.05</b>    | 0.04        |
|             | <b>Ensemble (LGB)</b> | 1690.01        | 3.20          | 2144.80        | 3.98          | 1456.95        | 2.78          | 9.58        | 11.52        | 0.93             | 0.89        | 0.98        | 0.96        | 0.09        | 0.12        | 0.09        | 0.11        | 0.09           | 0.11        |
|             | <b>Ensemble (Mix)</b> | 1200.12        | 2.65          | 1677.90        | 3.42          | 874.13         | 2.16          | 6.68        | 9.47         | 0.95             | 0.92        | 0.98        | 0.96        | 0.07        | 0.04        | 0.06        | 0.04        | 0.06           | 0.04        |
| AMD 7502    | <b>AutoGluon</b>      | <b>1570.47</b> | <b>15.84</b>  | <b>2297.45</b> | <b>22.15</b>  | <b>1021.43</b> | <b>11.24</b>  | <b>3.84</b> | <b>4.89</b>  | <b>0.99</b>      | <b>0.98</b> | <b>0.99</b> | <b>0.99</b> | <b>0.17</b> | <b>0.35</b> | <b>0.15</b> | <b>0.31</b> | <b>0.15</b>    | <b>0.31</b> |
|             | <b>Ensemble (XGB)</b> | 1697.98        | 16.83         | 2420.66        | 23.22         | 1107.53        | 12.16         | 4.12        | 5.16         | 0.99             | 0.98        | 0.99        | 0.99        | 0.20        | 0.39        | 0.17        | 0.34        | 0.17           | 0.35        |
|             | <b>Ensemble (LGB)</b> | 3764.57        | 31.28         | 4531.32        | 38.53         | 3489.26        | 26.99         | 9.94        | 10.26        | 0.96             | 0.95        | 0.99        | 0.99        | 0.45        | 0.51        | 0.39        | 0.44        | 0.40           | 0.44        |
|             | <b>Ensemble (Mix)</b> | 1693.33        | 16.82         | 2425.90        | 23.07         | 1110.10        | 12.23         | 4.13        | 5.21         | 0.99             | 0.98        | 0.99        | 0.99        | 0.20        | 0.41        | 0.17        | 0.36        | 0.17           | 0.36        |
| AMD 7513    | <b>AutoGluon</b>      | <b>3321.83</b> | <b>150.24</b> | <b>5518.96</b> | <b>221.10</b> | <b>2174.08</b> | <b>103.02</b> | <b>2.76</b> | <b>10.55</b> | <b>0.99</b>      | <b>0.93</b> | <b>1.00</b> | <b>0.96</b> | <b>0.38</b> | <b>0.53</b> | <b>0.34</b> | <b>0.46</b> | <b>0.34</b>    | <b>0.46</b> |
|             | <b>Ensemble (XGB)</b> | 3761.37        | 157.08        | 6054.88        | 230.02        | 2633.74        | 108.79        | 3.23        | 11.14        | 0.99             | 0.92        | 1.00        | 0.96        | 0.41        | 0.54        | 0.36        | 0.46        | 0.36           | 0.47        |
|             | <b>Ensemble (LGB)</b> | 11204.40       | 187.74        | 13456.74       | 268.02        | 10465.21       | 150.15        | 10.68       | 14.91        | 0.96             | 0.89        | 1.00        | 0.96        | 0.55        | 0.54        | 0.47        | 0.47        | 0.48           | 0.47        |
|             | <b>Ensemble (Mix)</b> | 3852.39        | 154.29        | 6098.78        | 226.36        | 2635.35        | 104.72        | 3.22        | 10.85        | 0.99             | 0.92        | 1.00        | 0.96        | 0.41        | 0.54        | 0.36        | 0.47        | 0.36           | 0.47        |
| AMD 7452    | <b>AutoGluon</b>      | <b>4879.20</b> | <b>14.75</b>  | <b>6100.78</b> | <b>18.95</b>  | 3820.30        | 11.39         | <b>9.02</b> | <b>9.21</b>  | <b>0.95</b>      | <b>0.95</b> | <b>0.98</b> | <b>0.97</b> | <b>0.41</b> | <b>0.47</b> | <b>0.36</b> | <b>0.41</b> | <b>0.37</b>    | <b>0.41</b> |
|             | <b>Ensemble (XGB)</b> | 4930.64        | 15.06         | 6253.26        | 19.54         | 3817.53        | 11.60         | 9.16        | 9.46         | 0.95             | 0.95        | 0.98        | 0.97        | 0.44        | 0.47        | 0.39        | 0.41        | 0.39           | 0.42        |
|             | <b>Ensemble (LGB)</b> | 5907.72        | 18.06         | 7569.56        | 23.38         | 4669.03        | 14.40         | 11.97       | 12.29        | 0.93             | 0.92        | 0.98        | 0.97        | 0.45        | 0.48        | 0.40        | 0.41        | 0.40           | 0.42        |
|             | <b>Ensemble (Mix)</b> | 4903.38        | 14.94         | 6172.90        | 19.31         | <b>3738.50</b> | <b>11.25</b>  | 9.12        | 9.36         | 0.95             | 0.95        | 0.98        | 0.97        | 0.46        | 0.48        | 0.40        | 0.42        | 0.40           | 0.42        |

Table 7: Various performance metrics of surrogates evaluated to predict latencies and energies on GPT-M for different GPUs. The arrow on the side of the metric name indicates if lower or higher is better.

| GPU     | Surrogate      | Accuracy    |             |              |             |             |             |             |              |                  |             |             |             | Calibration |             |             |             |                |             |
|---------|----------------|-------------|-------------|--------------|-------------|-------------|-------------|-------------|--------------|------------------|-------------|-------------|-------------|-------------|-------------|-------------|-------------|----------------|-------------|
|         |                | MAE ↓       |             | RMSE ↓       |             | MDAE ↓      |             | MARPD ↓     |              | R <sup>2</sup> ↑ |             | Corr. ↑     |             | RMS Cal. ↓  |             | MA Cal. ↓   |             | Miscal. Area ↓ |             |
|         |                | latencies   | energies    | latencies    | energies    | latencies   | energies    | latencies   | energies     | latencies        | energies    | latencies   | energies    | latencies   | energies    | latencies   | energies    | latencies      | energies    |
| A100    | AutoGluon      | <b>2.31</b> | <b>0.10</b> | <b>3.59</b>  | <b>0.36</b> | <b>1.17</b> | <b>0.06</b> | <b>0.74</b> | <b>6.50</b>  | <b>1.00</b>      | <b>0.84</b> | <b>1.00</b> | <b>0.92</b> | <b>0.45</b> | 0.40        | <b>0.39</b> | 0.35        | <b>0.39</b>    | 0.36        |
|         | Ensemble (XGB) | 3.35        | 0.13        | 4.66         | 0.39        | 2.30        | 0.07        | 1.17        | 7.94         | 1.00             | 0.81        | 1.00        | 0.90        | 0.50        | 0.36        | 0.43        | 0.32        | 0.44           | 0.32        |
|         | Ensemble (LGB) | 13.88       | 0.16        | 16.12        | 0.39        | 13.82       | 0.13        | 5.37        | 12.00        | 0.97             | 0.81        | 1.00        | 0.91        | 0.57        | <b>0.24</b> | 0.49        | <b>0.21</b> | 0.49           | <b>0.22</b> |
|         | Ensemble (Mix) | 3.21        | 0.12        | 4.50         | 0.37        | 2.21        | 0.07        | 1.11        | 7.32         | 1.00             | 0.82        | 1.00        | 0.91        | 0.48        | 0.37        | 0.42        | 0.33        | 0.43           | 0.33        |
| A40     | AutoGluon      | <b>1.12</b> | <b>0.26</b> | <b>1.68</b>  | <b>0.35</b> | <b>0.67</b> | <b>0.18</b> | <b>0.28</b> | <b>6.38</b>  | <b>1.00</b>      | <b>0.98</b> | <b>1.00</b> | <b>0.99</b> | <b>0.45</b> | 0.20        | <b>0.39</b> | 0.18        | <b>0.40</b>    | 0.18        |
|         | Ensemble (XGB) | 4.16        | 0.27        | 5.58         | 0.36        | 3.19        | 0.20        | 1.17        | 6.82         | 1.00             | 0.98        | 1.00        | 0.99        | 0.54        | 0.18        | 0.47        | 0.16        | 0.47           | 0.16        |
|         | Ensemble (LGB) | 23.39       | 0.48        | 26.62        | 0.56        | 24.93       | 0.45        | 7.11        | 13.17        | 0.97             | 0.95        | 1.00        | 0.99        | 0.57        | <b>0.08</b> | 0.49        | <b>0.08</b> | 0.49           | <b>0.08</b> |
|         | Ensemble (Mix) | 4.01        | 0.27        | 5.47         | 0.36        | 2.94        | 0.19        | 1.09        | 6.63         | 1.00             | 0.98        | 1.00        | 0.99        | 0.54        | 0.19        | 0.46        | 0.17        | 0.47           | 0.1         |
| H100    | AutoGluon      | <b>0.27</b> | <b>0.05</b> | <b>0.37</b>  | <b>0.07</b> | <b>0.21</b> | <b>0.04</b> | <b>0.24</b> | <b>4.57</b>  | <b>1.00</b>      | <b>0.95</b> | <b>1.00</b> | <b>0.98</b> | <b>0.22</b> | <b>0.24</b> | <b>0.19</b> | <b>0.21</b> | <b>0.20</b>    | <b>0.21</b> |
|         | Ensemble (XGB) | 0.91        | 0.05        | 1.19         | 0.07        | 0.74        | 0.04        | 0.81        | 4.72         | 1.00             | 0.95        | 1.00        | 0.98        | 0.45        | 0.24        | 0.39        | 0.22        | 0.40           | 0.22        |
|         | Ensemble (LGB) | 4.49        | 0.07        | 5.14         | 0.09        | 4.54        | 0.06        | 4.04        | 6.25         | 0.97             | 0.92        | 1.00        | 0.98        | 0.56        | 0.31        | 0.48        | 0.27        | 0.48           | 0.27        |
|         | Ensemble (Mix) | 0.87        | 0.05        | 1.15         | 0.07        | 0.68        | 0.04        | 0.76        | 4.68         | 1.00             | 0.95        | 1.00        | 0.98        | 0.45        | 0.24        | 0.39        | 0.21        | 0.40           | 0.22        |
| RTX2080 | AutoGluon      | <b>9.13</b> | <b>0.17</b> | <b>12.76</b> | <b>0.23</b> | <b>6.70</b> | <b>0.12</b> | <b>1.36</b> | <b>3.04</b>  | <b>1.00</b>      | <b>1.00</b> | <b>1.00</b> | <b>1.00</b> | <b>0.11</b> | 0.35        | <b>0.07</b> | 0.31        | <b>0.07</b>    | 0.31        |
|         | Ensemble (XGB) | 11.91       | 0.19        | 16.15        | 0.27        | 8.86        | 0.14        | 1.83        | 3.35         | 0.99             | 1.00        | 1.00        | 1.00        | 0.16        | 0.32        | 0.12        | 0.28        | 0.12           | 0.29        |
|         | Ensemble (LGB) | 34.99       | 0.60        | 41.31        | 0.70        | 34.08       | 0.57        | 5.73        | 9.74         | 0.97             | 0.97        | 1.00        | 1.00        | 0.37        | <b>0.09</b> | 0.33        | <b>0.07</b> | 0.33           | <b>0.07</b> |
|         | Ensemble (Mix) | 11.58       | 0.20        | 15.82        | 0.27        | 8.78        | 0.15        | 1.76        | 3.43         | 0.99             | 1.00        | 1.00        | 1.00        | 0.16        | 0.32        | 0.12        | 0.28        | 0.13           | 0.28        |
| RTX3080 | AutoGluon      | <b>2.90</b> | <b>0.82</b> | <b>4.62</b>  | <b>1.06</b> | <b>1.70</b> | <b>0.59</b> | <b>0.54</b> | 16.97        | <b>1.00</b>      | <b>0.93</b> | <b>1.00</b> | <b>0.97</b> | <b>0.14</b> | <b>0.20</b> | <b>0.11</b> | <b>0.18</b> | <b>0.11</b>    | <b>0.19</b> |
|         | Ensemble (XGB) | 5.82        | 0.83        | 8.10         | 1.08        | 4.52        | 0.63        | 1.28        | 17.18        | 1.00             | 0.93        | 1.00        | 0.96        | 0.26        | 0.24        | 0.21        | 0.21        | 0.21           | 0.21        |
|         | Ensemble (LGB) | 34.62       | 1.00        | 38.99        | 1.28        | 36.60       | 0.87        | 7.87        | 22.33        | 0.97             | 0.90        | 1.00        | 0.96        | 0.55        | 0.32        | 0.47        | 0.27        | 0.48           | 0.27        |
|         | Ensemble (Mix) | 5.95        | 0.83        | 8.17         | 1.07        | 4.63        | 0.63        | 1.30        | <b>16.84</b> | 1.00             | 0.93        | 1.00        | 0.96        | 0.27        | 0.24        | 0.22        | 0.21        | 0.22           | 0.21        |
| A6000   | AutoGluon      | <b>0.70</b> | <b>0.11</b> | <b>1.06</b>  | <b>0.18</b> | <b>0.46</b> | <b>0.07</b> | <b>0.21</b> | <b>3.97</b>  | <b>1.00</b>      | <b>0.99</b> | <b>1.00</b> | <b>0.99</b> | <b>0.32</b> | 0.20        | <b>0.28</b> | 0.18        | <b>0.28</b>    | 0.18        |
|         | Ensemble (XGB) | 3.66        | 0.12        | 4.93         | 0.19        | 2.82        | 0.07        | 1.16        | 4.25         | 1.00             | 0.99        | 1.00        | 0.99        | 0.52        | 0.18        | 0.45        | 0.16        | 0.46           | 0.16        |
|         | Ensemble (LGB) | 20.92       | 0.27        | 23.81        | 0.34        | 22.15       | 0.23        | 7.19        | 10.84        | 0.97             | 0.96        | 1.00        | 0.99        | 0.57        | 0.21        | 0.49        | 0.19        | 0.49           | 0.19        |
|         | Ensemble (Mix) | 3.52        | 0.14        | 4.86         | 0.20        | 2.57        | 0.10        | 1.08        | 5.25         | 1.00             | 0.99        | 1.00        | 0.99        | 0.52        | <b>0.10</b> | 0.45        | <b>0.09</b> | 0.46           | <b>0.09</b> |
| V100    | AutoGluon      | <b>9.43</b> | <b>0.16</b> | <b>11.64</b> | <b>0.35</b> | <b>7.92</b> | <b>0.05</b> | <b>2.60</b> | <b>4.46</b>  | <b>0.99</b>      | <b>0.99</b> | <b>1.00</b> | <b>0.99</b> | <b>0.37</b> | <b>0.08</b> | <b>0.33</b> | <b>0.07</b> | <b>0.33</b>    | <b>0.07</b> |
|         | Ensemble (XGB) | 10.24       | 0.24        | 12.67        | 0.45        | 8.31        | 0.10        | 2.71        | 7.80         | 0.99             | 0.98        | 1.00        | 0.99        | 0.42        | 0.20        | 0.37        | 0.15        | 0.37           | 0.15        |
|         | Ensemble (LGB) | 26.38       | 0.54        | 30.14        | 0.67        | 25.11       | 0.42        | 6.63        | 25.46        | 0.97             | 0.96        | 1.00        | 0.99        | 0.54        | 0.40        | 0.46        | 0.34        | 0.47           | 0.35        |
|         | Ensemble (Mix) | 10.46       | 0.32        | 12.69        | 0.46        | 9.43        | 0.23        | 2.81        | 15.49        | 0.99             | 0.98        | 1.00        | 0.99        | 0.42        | 0.31        | 0.37        | 0.25        | 0.37           | 0.25        |
| P100    | AutoGluon      | <b>6.87</b> | <b>0.66</b> | <b>10.69</b> | <b>0.96</b> | <b>4.52</b> | <b>0.42</b> | <b>0.28</b> | <b>2.38</b>  | <b>1.00</b>      | <b>1.00</b> | <b>1.00</b> | <b>1.00</b> | <b>0.32</b> | 0.06        | <b>0.28</b> | 0.04        | <b>0.28</b>    | 0.04        |
|         | Ensemble (XGB) | 33.86       | 0.73        | 48.02        | 1.06        | 24.22       | 0.46        | 1.39        | 2.63         | 1.00             | 1.00        | 1.00        | 1.00        | 0.52        | <b>0.03</b> | 0.45        | <b>0.03</b> | 0.46           | <b>0.03</b> |
|         | Ensemble (LGB) | 213.74      | 2.55        | 241.02       | 3.03        | 224.82      | 2.33        | 10.04       | 11.36        | 0.97             | 0.97        | 1.00        | 1.00        | 0.57        | 0.43        | 0.49        | 0.38        | 0.49           | 0.38        |
|         | Ensemble (Mix) | 38.65       | 0.89        | 52.59        | 1.21        | 28.81       | 0.69        | 1.60        | 3.61         | 1.00             | 0.99        | 1.00        | 1.00        | 0.53        | 0.08        | 0.46        | 0.06        | 0.47           | 0.07        |

Table 8: Various performance metrics of surrogates evaluated to predict latencies and energies on GPT-M for different CPUs. The arrow on the side of the metric name indicates if lower or higher is better.

| CPU         | Surrogate             | Accuracy       |               |                |               |                |               |             |              |                  |             |             |             | Calibration |             |             |             |                |             |
|-------------|-----------------------|----------------|---------------|----------------|---------------|----------------|---------------|-------------|--------------|------------------|-------------|-------------|-------------|-------------|-------------|-------------|-------------|----------------|-------------|
|             |                       | MAE ↓          |               | RMSE ↓         |               | MDAE ↓         |               | MARPD ↓     |              | R <sup>2</sup> ↑ |             | Corr. ↑     |             | RMS Cal. ↓  |             | MA Cal. ↓   |             | Miscal. Area ↓ |             |
|             |                       | latencies      | energies      | latencies      | energies      | latencies      | energies      | latencies   | energies     | latencies        | energies    | latencies   | energies    | latencies   | energies    | latencies   | energies    | latencies      | energies    |
| Xeon Silver | <b>AutoGluon</b>      | <b>1713.09</b> | <b>13.02</b>  | <b>2355.46</b> | <b>16.40</b>  | <b>1261.81</b> | 10.12         | <b>3.50</b> | <b>11.85</b> | <b>0.99</b>      | <b>0.94</b> | <b>1.00</b> | <b>0.97</b> | <b>0.08</b> | 0.54        | <b>0.07</b> | 0.46        | <b>0.07</b>    | 0.47        |
|             | <b>Ensemble (XGB)</b> | 1867.00        | 13.19         | 2544.82        | 16.74         | 1379.22        | 10.25         | 3.78        | 12.04        | 0.99             | 0.93        | 1.00        | 0.97        | 0.14        | <b>0.54</b> | 0.12        | <b>0.46</b> | 0.12           | <b>0.47</b> |
|             | <b>Ensemble (LGB)</b> | 5077.16        | 15.70         | 5981.26        | 20.00         | 4830.55        | 13.47         | 10.78       | 15.19        | 0.97             | 0.91        | 1.00        | 0.97        | 0.44        | 0.54        | 0.38        | 0.46        | 0.39           | 0.47        |
|             | <b>Ensemble (Mix)</b> | 1913.78        | 13.05         | 2597.53        | 16.48         | 1464.40        | <b>9.92</b>   | 3.87        | 11.93        | 0.99             | 0.94        | 1.00        | 0.97        | 0.14        | 0.54        | 0.12        | 0.46        | 0.12           | 0.47        |
| Xeon Gold   | <b>AutoGluon</b>      | <b>997.52</b>  | <b>1.78</b>   | <b>1342.44</b> | <b>2.36</b>   | <b>749.29</b>  | <b>1.37</b>   | <b>4.66</b> | <b>5.51</b>  | <b>0.99</b>      | <b>0.98</b> | <b>0.99</b> | <b>0.99</b> | 0.21        | <b>0.02</b> | 0.19        | <b>0.02</b> | 0.19           | <b>0.02</b> |
|             | <b>Ensemble (XGB)</b> | 1059.66        | 1.88          | 1399.18        | 2.46          | 835.65         | 1.49          | 5.00        | 5.82         | 0.99             | 0.98        | 0.99        | 0.99        | 0.19        | 0.02        | 0.17        | 0.02        | 0.17           | 0.02        |
|             | <b>Ensemble (LGB)</b> | 2038.55        | 3.23          | 2439.66        | 3.88          | 1886.11        | 2.99          | 9.75        | 9.79         | 0.96             | 0.96        | 0.99        | 0.99        | <b>0.08</b> | 0.22        | <b>0.07</b> | 0.20        | <b>0.07</b>    | 0.20        |
|             | <b>Ensemble (Mix)</b> | 1042.62        | 1.88          | 1395.96        | 2.47          | 795.68         | 1.47          | 4.81        | 5.74         | 0.99             | 0.98        | 0.99        | 0.99        | 0.20        | 0.02        | 0.18        | 0.02        | 0.18           | 0.02        |
| AMD 7502    | <b>AutoGluon</b>      | <b>2793.38</b> | <b>22.27</b>  | <b>3832.68</b> | <b>29.64</b>  | <b>2039.52</b> | <b>16.81</b>  | <b>4.75</b> | <b>4.81</b>  | <b>0.99</b>      | <b>0.99</b> | <b>0.99</b> | <b>0.99</b> | <b>0.36</b> | <b>0.45</b> | <b>0.32</b> | <b>0.40</b> | <b>0.32</b>    | <b>0.40</b> |
|             | <b>Ensemble (XGB)</b> | 2889.71        | 22.93         | 3927.64        | 30.61         | 2083.31        | 17.06         | 4.95        | 4.98         | 0.99             | 0.99        | 0.99        | 0.99        | 0.41        | 0.47        | 0.36        | 0.41        | 0.36           | 0.41        |
|             | <b>Ensemble (LGB)</b> | 5664.76        | 44.12         | 6951.41        | 54.57         | 5092.86        | 39.69         | 11.17       | 11.02        | 0.96             | 0.96        | 0.99        | 0.99        | 0.51        | 0.51        | 0.44        | 0.44        | 0.44           | 0.45        |
|             | <b>Ensemble (Mix)</b> | 2888.22        | 22.81         | 3930.69        | 30.58         | 2101.56        | 16.93         | 4.95        | 4.94         | 0.99             | 0.99        | 0.99        | 0.99        | 0.41        | 0.46        | 0.36        | 0.40        | 0.36           | 0.40        |
| AMD 7513    | <b>AutoGluon</b>      | <b>3297.57</b> | <b>315.32</b> | <b>6512.33</b> | <b>708.51</b> | <b>1709.93</b> | <b>174.70</b> | <b>1.92</b> | <b>14.36</b> | <b>1.00</b>      | <b>0.74</b> | <b>1.00</b> | <b>0.86</b> | <b>0.46</b> | 0.55        | <b>0.40</b> | 0.48        | <b>0.40</b>    | 0.48        |
|             | <b>Ensemble (XGB)</b> | 4020.05        | 344.26        | 7071.85        | 724.33        | 2639.66        | 200.98        | 2.55        | 15.96        | 1.00             | 0.72        | 1.00        | 0.85        | 0.49        | 0.55        | 0.43        | 0.48        | 0.43           | 0.48        |
|             | <b>Ensemble (LGB)</b> | 15744.34       | 367.84        | 18417.64       | 744.75        | 15733.28       | 256.65        | 11.25       | 19.37        | 0.97             | 0.71        | 1.00        | 0.85        | 0.57        | 0.56        | 0.49        | 0.48        | 0.49           | 0.49        |
|             | <b>Ensemble (Mix)</b> | 4390.21        | 329.13        | 7277.61        | 717.62        | 3043.23        | 183.58        | 2.72        | 14.82        | 0.99             | 0.73        | 1.00        | 0.85        | 0.50        | <b>0.55</b> | 0.44        | <b>0.48</b> | 0.44           | <b>0.48</b> |
| AMD 7452    | <b>AutoGluon</b>      | <b>6422.40</b> | <b>19.16</b>  | <b>8400.06</b> | <b>25.91</b>  | <b>4603.69</b> | <b>13.53</b>  | <b>8.76</b> | <b>8.80</b>  | <b>0.96</b>      | <b>0.96</b> | <b>0.98</b> | <b>0.98</b> | <b>0.40</b> | <b>0.43</b> | <b>0.34</b> | <b>0.37</b> | <b>0.35</b>    | <b>0.38</b> |
|             | <b>Ensemble (XGB)</b> | 6583.99        | 19.77         | 8650.39        | 26.64         | 4800.54        | 14.12         | 9.01        | 9.17         | 0.96             | 0.96        | 0.98        | 0.98        | 0.46        | 0.47        | 0.40        | 0.41        | 0.41           | 0.42        |
|             | <b>Ensemble (LGB)</b> | 8414.41        | 25.28         | 11082.78       | 33.29         | 6746.91        | 20.86         | 13.18       | 13.17        | 0.93             | 0.93        | 0.98        | 0.98        | 0.49        | 0.51        | 0.43        | 0.44        | 0.43           | 0.44        |
|             | <b>Ensemble (Mix)</b> | 6535.60        | 19.66         | 8556.66        | 26.48         | 5013.65        | 14.41         | 8.93        | 9.06         | 0.96             | 0.96        | 0.98        | 0.98        | 0.46        | 0.47        | 0.40        | 0.41        | 0.40           | 0.41        |



Table 9: Various performance metrics of surrogates evaluated to predict latencies and energies on GPT-L for different GPUs. The arrow on the side of the metric name indicates if lower or higher is better.

| GPU     | Surrogate      | Accuracy     |             |              |             |              |             |             |              |                  |             |             |             | Calibration |             |             |             |                |             |
|---------|----------------|--------------|-------------|--------------|-------------|--------------|-------------|-------------|--------------|------------------|-------------|-------------|-------------|-------------|-------------|-------------|-------------|----------------|-------------|
|         |                | MAE ↓        |             | RMSE ↓       |             | MDAE ↓       |             | MARPD ↓     |              | R <sup>2</sup> ↑ |             | Corr. ↑     |             | RMS Cal. ↓  |             | MA Cal. ↓   |             | Miscal. Area ↓ |             |
|         |                | latencies    | energies    | latencies    | energies    | latencies    | energies    | latencies   | energies     | latencies        | energies    | latencies   | energies    | latencies   | energies    | latencies   | energies    | latencies      | energies    |
| A100    | AutoGluon      | <b>1.43</b>  | <b>0.34</b> | <b>1.97</b>  | <b>0.56</b> | <b>1.14</b>  | <b>0.16</b> | <b>0.70</b> | <b>6.63</b>  | <b>1.00</b>      | <b>0.98</b> | <b>1.00</b> | <b>0.99</b> | 0.31        | 0.39        | 0.24        | 0.34        | 0.24           | 0.34        |
|         | Ensemble (XGB) | 2.07         | 0.36        | 2.85         | 0.58        | 1.55         | 0.18        | 1.00        | 7.55         | 1.00             | 0.97        | 1.00        | 0.99        | 0.30        | 0.35        | 0.22        | 0.31        | 0.23           | 0.32        |
|         | Ensemble (LGB) | 9.28         | 0.67        | 10.63        | 0.84        | 9.24         | 0.54        | 4.75        | 18.27        | 0.97             | 0.95        | 1.00        | 0.99        | 0.46        | <b>0.13</b> | 0.41        | <b>0.10</b> | 0.41           | <b>0.10</b> |
|         | Ensemble (Mix) | 2.16         | 0.38        | 2.94         | 0.58        | 1.68         | 0.21        | 1.04        | 8.26         | 1.00             | 0.97        | 1.00        | 0.99        | <b>0.29</b> | 0.34        | <b>0.22</b> | 0.30        | <b>0.22</b>    | 0.31        |
| A40     | AutoGluon      | <b>0.61</b>  | <b>0.18</b> | <b>0.90</b>  | <b>0.23</b> | <b>0.41</b>  | <b>0.15</b> | <b>0.27</b> | <b>2.43</b>  | <b>1.00</b>      | <b>1.00</b> | <b>1.00</b> | <b>1.00</b> | <b>0.44</b> | 0.38        | <b>0.39</b> | 0.34        | <b>0.39</b>    | 0.35        |
|         | Ensemble (XGB) | 2.44         | 0.23        | 3.37         | 0.28        | 1.81         | 0.19        | 1.11        | 2.88         | 1.00             | 1.00        | 1.00        | 1.00        | 0.54        | 0.36        | 0.47        | 0.32        | 0.47           | 0.32        |
|         | Ensemble (LGB) | 15.23        | 0.83        | 17.17        | 0.95        | 16.50        | 0.87        | 7.69        | 10.53        | 0.97             | 0.97        | 1.00        | 1.00        | 0.57        | <b>0.06</b> | 0.49        | <b>0.05</b> | 0.49           | <b>0.05</b> |
|         | Ensemble (Mix) | 2.41         | 0.22        | 3.34         | 0.28        | 1.74         | 0.19        | 1.07        | 2.79         | 1.00             | 1.00        | 1.00        | 1.00        | 0.54        | 0.36        | 0.47        | 0.32        | 0.47           | 0.33        |
| H100    | AutoGluon      | <b>0.15</b>  | <b>0.13</b> | <b>0.21</b>  | <b>0.17</b> | <b>0.11</b>  | 0.09        | <b>0.15</b> | <b>5.37</b>  | <b>1.00</b>      | <b>0.96</b> | <b>1.00</b> | <b>0.98</b> | <b>0.22</b> | 0.16        | <b>0.20</b> | 0.14        | <b>0.20</b>    | 0.14        |
|         | Ensemble (XGB) | 0.62         | 0.13        | 0.83         | 0.18        | 0.47         | 0.09        | 0.63        | 5.50         | 1.00             | 0.96        | 1.00        | 0.98        | 0.48        | 0.16        | 0.42        | 0.14        | 0.42           | 0.14        |
|         | Ensemble (LGB) | 3.61         | 0.18        | 4.11         | 0.23        | 3.79         | 0.15        | 3.84        | 8.09         | 0.97             | 0.93        | 1.00        | 0.98        | 0.56        | 0.27        | 0.48        | 0.25        | 0.49           | 0.25        |
|         | Ensemble (Mix) | 0.57         | 0.13        | 0.78         | 0.17        | 0.41         | <b>0.08</b> | 0.57        | 5.41         | 1.00             | 0.96        | 1.00        | 0.98        | 0.47        | <b>0.16</b> | 0.41        | <b>0.14</b> | 0.41           | <b>0.14</b> |
| RTX2080 | AutoGluon      | <b>2.40</b>  | <b>1.80</b> | <b>3.43</b>  | <b>2.58</b> | <b>1.53</b>  | 1.12        | <b>0.59</b> | <b>10.68</b> | <b>1.00</b>      | <b>0.90</b> | <b>1.00</b> | <b>0.95</b> | 0.16        | <b>0.24</b> | 0.14        | <b>0.22</b> | 0.14           | <b>0.22</b> |
|         | Ensemble (XGB) | 5.21         | 1.83        | 6.98         | 2.63        | 4.06         | 1.15        | 1.30        | 10.91        | 1.00             | 0.90        | 1.00        | 0.95        | <b>0.16</b> | 0.29        | <b>0.13</b> | 0.25        | <b>0.13</b>    | 0.25        |
|         | Ensemble (LGB) | 28.00        | 2.09        | 31.84        | 2.92        | 30.68        | 1.42        | 7.61        | 13.14        | 0.97             | 0.88        | 1.00        | 0.95        | 0.35        | 0.35        | 0.32        | 0.30        | 0.32           | 0.31        |
|         | Ensemble (Mix) | 4.79         | 1.83        | 6.60         | 2.62        | 3.46         | <b>1.09</b> | 1.14        | 10.92        | 1.00             | 0.90        | 1.00        | 0.95        | 0.16        | 0.30        | 0.13        | 0.26        | 0.13           | 0.27        |
| RTX3080 | AutoGluon      | <b>1.49</b>  | <b>0.68</b> | <b>2.13</b>  | <b>0.77</b> | <b>0.99</b>  | 0.66        | <b>0.50</b> | <b>6.50</b>  | <b>1.00</b>      | <b>0.99</b> | <b>1.00</b> | <b>1.00</b> | <b>0.13</b> | 0.07        | <b>0.12</b> | 0.06        | <b>0.12</b>    | 0.06        |
|         | Ensemble (XGB) | 3.95         | 0.70        | 5.40         | 0.81        | 2.89         | 0.65        | 1.36        | 6.59         | 1.00             | 0.99        | 1.00        | 1.00        | 0.21        | 0.07        | 0.15        | 0.06        | 0.16           | 0.06        |
|         | Ensemble (LGB) | 22.68        | 1.46        | 25.65        | 1.71        | 24.92        | 1.42        | 8.86        | 12.08        | 0.97             | 0.96        | 1.00        | 1.00        | 0.52        | 0.12        | 0.45        | 0.11        | 0.46           | 0.11        |
|         | Ensemble (Mix) | 3.86         | 0.69        | 5.32         | 0.81        | 2.78         | <b>0.65</b> | 1.32        | 6.56         | 1.00             | 0.99        | 1.00        | 1.00        | 0.23        | <b>0.07</b> | 0.17        | <b>0.06</b> | 0.17           | <b>0.06</b> |
| A6000   | AutoGluon      | <b>1.56</b>  | <b>0.45</b> | <b>2.24</b>  | <b>0.61</b> | <b>1.08</b>  | <b>0.33</b> | <b>0.74</b> | <b>7.13</b>  | <b>1.00</b>      | <b>0.98</b> | <b>1.00</b> | <b>0.99</b> | <b>0.48</b> | 0.20        | <b>0.42</b> | 0.17        | <b>0.42</b>    | 0.18        |
|         | Ensemble (XGB) | 2.22         | 0.47        | 3.06         | 0.63        | 1.57         | 0.34        | 1.11        | 7.21         | 1.00             | 0.98        | 1.00        | 0.99        | 0.51        | 0.19        | 0.44        | 0.17        | 0.45           | 0.17        |
|         | Ensemble (LGB) | 13.40        | 0.84        | 15.18        | 1.04        | 14.58        | 0.67        | 7.47        | 12.16        | 0.97             | 0.95        | 1.00        | 0.99        | 0.57        | <b>0.03</b> | 0.49        | <b>0.02</b> | 0.49           | <b>0.02</b> |
|         | Ensemble (Mix) | 2.08         | 0.46        | 2.95         | 0.63        | 1.45         | 0.34        | 0.99        | 7.36         | 1.00             | 0.98        | 1.00        | 0.99        | 0.50        | 0.17        | 0.43        | 0.15        | 0.44           | 0.15        |
| V100    | AutoGluon      | 11.61        | <b>0.30</b> | <b>13.29</b> | <b>2.99</b> | 11.30        | <b>0.15</b> | 4.23        | <b>3.74</b>  | <b>0.98</b>      | <b>0.86</b> | <b>0.99</b> | <b>0.93</b> | <b>0.52</b> | 0.21        | <b>0.45</b> | 0.19        | <b>0.45</b>    | 0.19        |
|         | Ensemble (XGB) | <b>11.50</b> | 0.44        | 13.66        | 3.02        | <b>10.46</b> | 0.25        | <b>4.16</b> | 6.43         | 0.98             | 0.86        | 0.99        | 0.93        | 0.54        | <b>0.05</b> | 0.47        | <b>0.05</b> | 0.47           | <b>0.05</b> |
|         | Ensemble (LGB) | 17.77        | 1.32        | 22.53        | 3.31        | 13.23        | 1.34        | 6.55        | 25.45        | 0.96             | 0.83        | 0.99        | 0.93        | 0.54        | 0.34        | 0.46        | 0.30        | 0.47           | 0.30        |
|         | Ensemble (Mix) | 11.84        | 0.43        | 13.63        | 3.03        | 10.69        | 0.24        | 4.35        | 6.30         | 0.98             | 0.86        | 0.99        | 0.93        | 0.55        | 0.07        | 0.47        | 0.06        | 0.48           | 0.06        |
| P100    | AutoGluon      | <b>5.59</b>  | <b>0.78</b> | <b>7.81</b>  | <b>1.27</b> | <b>4.28</b>  | <b>0.40</b> | <b>0.52</b> | <b>1.31</b>  | <b>1.00</b>      | <b>1.00</b> | <b>1.00</b> | <b>1.00</b> | <b>0.29</b> | 0.13        | <b>0.26</b> | 0.11        | <b>0.26</b>    | 0.12        |
|         | Ensemble (XGB) | 21.84        | 1.17        | 29.68        | 1.77        | 16.52        | 0.73        | 1.61        | 2.18         | 1.00             | 1.00        | 1.00        | 1.00        | 0.49        | <b>0.06</b> | 0.43        | <b>0.06</b> | 0.43           | <b>0.06</b> |
|         | Ensemble (LGB) | 131.33       | 5.74        | 146.45       | 6.60        | 139.03       | 5.69        | 10.74       | 13.53        | 0.97             | 0.97        | 1.00        | 1.00        | 0.57        | 0.50        | 0.49        | 0.44        | 0.49           | 0.44        |
|         | Ensemble (Mix) | 23.97        | 1.64        | 31.74        | 2.20        | 18.94        | 1.30        | 1.76        | 3.66         | 1.00             | 1.00        | 1.00        | 1.00        | 0.49        | 0.20        | 0.42        | 0.18        | 0.43           | 0.18        |

Table 10: Various performance metrics of surrogates evaluated to predict latencies and energies on GPT-L for different CPUs. The arrow on the side of the metric name indicates if lower or higher is better.

| CPU         | Surrogate      | Accuracy       |               |                |               |               |              |              |              |                  |             | Calibration |             |             |             |             |             |                |             |
|-------------|----------------|----------------|---------------|----------------|---------------|---------------|--------------|--------------|--------------|------------------|-------------|-------------|-------------|-------------|-------------|-------------|-------------|----------------|-------------|
|             |                | MAE ↓          |               | RMSE ↓         |               | MDAE ↓        |              | MARPD ↓      |              | R <sup>2</sup> ↑ |             | Corr. ↑     |             | RMS Cal. ↓  |             | MA Cal. ↓   |             | Miscal. Area ↓ |             |
|             |                | latencies      | energies      | latencies      | energies      | latencies     | energies     | latencies    | energies     | latencies        | energies    | latencies   | energies    | latencies   | energies    | latencies   | energies    | latencies      | energies    |
| Xeon Silver | AutoGluon      | <b>636.15</b>  | 5.61          | <b>864.06</b>  | <b>7.70</b>   | <b>494.13</b> | 3.93         | <b>2.54</b>  | <b>9.84</b>  | <b>1.00</b>      | <b>0.96</b> | <b>1.00</b> | <b>0.98</b> | 0.17        | 0.44        | 0.15        | 0.38        | 0.15           | 0.39        |
|             | Ensemble (XGB) | 753.47         | 5.72          | 1025.05        | 7.81          | 578.99        | 4.01         | 2.96         | 10.02        | 1.00             | 0.96        | 1.00        | 0.98        | 0.08        | <b>0.42</b> | 0.07        | <b>0.36</b> | 0.07           | <b>0.37</b> |
|             | Ensemble (LGB) | 2824.18        | 8.02          | 3236.41        | 9.97          | 2733.85       | 6.99         | 11.64        | 14.87        | 0.97             | 0.93        | 1.00        | 0.98        | 0.41        | 0.48        | 0.37        | 0.41        | 0.37           | 0.42        |
|             | Ensemble (Mix) | 794.59         | <b>5.60</b>   | 1061.38        | 7.73          | 619.52        | <b>3.82</b>  | 3.12         | 10.00        | 1.00             | 0.96        | 1.00        | 0.98        | <b>0.06</b> | 0.42        | <b>0.05</b> | 0.36        | <b>0.06</b>    | 0.37        |
| Xeon Gold   | AutoGluon      | <b>1808.83</b> | <b>2.94</b>   | <b>4993.72</b> | <b>9.06</b>   | <b>961.39</b> | <b>1.64</b>  | <b>12.44</b> | <b>12.52</b> | <b>0.65</b>      | <b>0.60</b> | <b>0.81</b> | <b>0.77</b> | <b>0.04</b> | <b>0.22</b> | <b>0.03</b> | <b>0.20</b> | <b>0.03</b>    | <b>0.20</b> |
|             | Ensemble (XGB) | 2071.91        | 3.33          | 5172.30        | 9.21          | 1192.99       | 2.01         | 14.28        | 14.39        | 0.62             | 0.58        | 0.79        | 0.76        | 0.23        | 0.36        | 0.21        | 0.32        | 0.21           | 0.32        |
|             | Ensemble (LGB) | 2276.83        | 3.72          | 5208.21        | 9.42          | 1546.31       | 2.52         | 16.82        | 17.10        | 0.62             | 0.56        | 0.80        | 0.76        | 0.32        | 0.42        | 0.28        | 0.37        | 0.28           | 0.37        |
|             | Ensemble (Mix) | 1956.75        | 3.15          | 5056.95        | 9.17          | 1058.07       | 1.74         | 13.15        | 13.29        | 0.64             | 0.59        | 0.80        | 0.77        | 0.21        | 0.35        | 0.18        | 0.31        | 0.18           | 0.31        |
| AMD 7502    | AutoGluon      | <b>979.59</b>  | <b>10.85</b>  | <b>1401.41</b> | <b>15.13</b>  | <b>637.77</b> | <b>7.47</b>  | <b>3.47</b>  | <b>4.78</b>  | <b>0.99</b>      | <b>0.99</b> | <b>1.00</b> | <b>0.99</b> | <b>0.32</b> | 0.46        | <b>0.29</b> | 0.40        | <b>0.29</b>    | 0.41        |
|             | Ensemble (XGB) | 1061.60        | 11.30         | 1488.69        | 15.60         | 747.04        | 8.16         | 3.90         | 5.16         | 0.99             | 0.99        | 1.00        | 0.99        | 0.36        | 0.47        | 0.32        | 0.41        | 0.32           | 0.41        |
|             | Ensemble (LGB) | 2963.13        | 24.72         | 3487.50        | 29.94         | 2788.52       | 22.54        | 12.75        | 13.26        | 0.96             | 0.96        | 1.00        | 0.99        | 0.53        | 0.54        | 0.46        | 0.47        | 0.46           | 0.47        |
|             | Ensemble (Mix) | 1077.05        | 11.22         | 1504.92        | 15.53         | 777.37        | 8.19         | 3.88         | 4.97         | 0.99             | 0.99        | 1.00        | 0.99        | 0.34        | <b>0.44</b> | 0.30        | <b>0.38</b> | 0.31           | <b>0.39</b> |
| AMD 7513    | AutoGluon      | <b>1341.23</b> | <b>138.82</b> | <b>2336.42</b> | <b>193.98</b> | <b>747.38</b> | <b>92.12</b> | <b>1.55</b>  | <b>13.84</b> | <b>1.00</b>      | <b>0.91</b> | <b>1.00</b> | <b>0.96</b> | <b>0.48</b> | <b>0.55</b> | <b>0.42</b> | <b>0.48</b> | <b>0.42</b>    | <b>0.48</b> |
|             | Ensemble (XGB) | 1821.68        | 141.56        | 2867.87        | 198.08        | 1203.03       | 97.95        | 2.32         | 14.26        | 1.00             | 0.91        | 1.00        | 0.95        | 0.53        | 0.56        | 0.45        | 0.48        | 0.46           | 0.48        |
|             | Ensemble (LGB) | 8438.54        | 158.86        | 9602.56        | 224.77        | 8622.26       | 129.98       | 12.73        | 18.19        | 0.97             | 0.88        | 1.00        | 0.95        | 0.57        | 0.56        | 0.49        | 0.48        | 0.49           | 0.49        |
|             | Ensemble (Mix) | 1990.32        | 141.12        | 2967.07        | 197.03        | 1402.25       | 103.07       | 2.56         | 14.02        | 1.00             | 0.91        | 1.00        | 0.95        | 0.53        | 0.56        | 0.46        | 0.48        | 0.46           | 0.49        |
| AMD 7452    | AutoGluon      | <b>766.81</b>  | <b>4.16</b>   | <b>1101.54</b> | <b>6.15</b>   | <b>535.75</b> | <b>2.72</b>  | <b>2.52</b>  | <b>4.20</b>  | <b>1.00</b>      | <b>0.99</b> | <b>1.00</b> | <b>1.00</b> | <b>0.05</b> | <b>0.26</b> | <b>0.04</b> | <b>0.23</b> | <b>0.05</b>    | <b>0.23</b> |
|             | Ensemble (XGB) | 895.53         | 4.40          | 1262.25        | 6.44          | 636.53        | 3.02         | 2.98         | 4.55         | 1.00             | 0.99        | 1.00        | 1.00        | 0.14        | 0.29        | 0.12        | 0.26        | 0.13           | 0.26        |
|             | Ensemble (LGB) | 3265.62        | 10.37         | 3747.71        | 12.55         | 3294.40       | 9.69         | 12.28        | 12.92        | 0.97             | 0.96        | 1.00        | 0.99        | 0.50        | 0.50        | 0.43        | 0.43        | 0.44           | 0.44        |
|             | Ensemble (Mix) | 920.19         | 4.45          | 1277.03        | 6.47          | 681.07        | 2.98         | 3.07         | 4.57         | 1.00             | 0.99        | 1.00        | 0.99        | 0.14        | 0.29        | 0.13        | 0.26        | 0.13           | 0.26        |

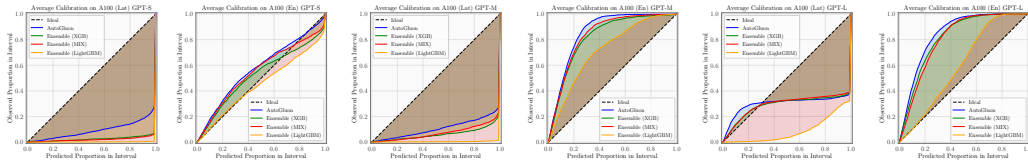

Figure 9: Calibration Areas A100

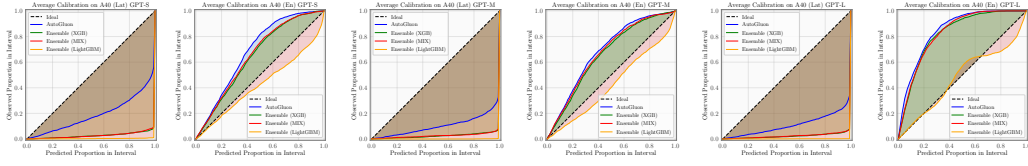

Figure 10: Calibration Areas A40

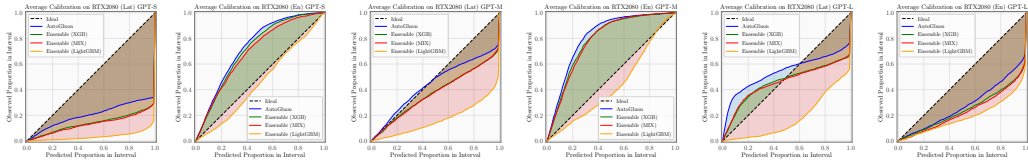

Figure 11: Calibration Areas RTX2080

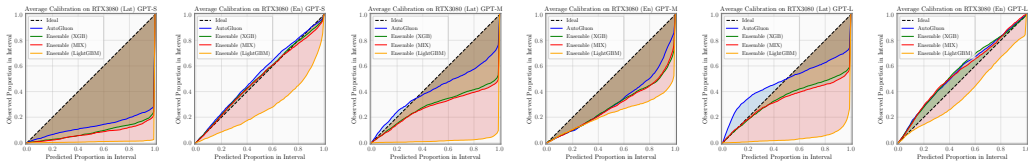

Figure 12: Calibration Areas RTX3080

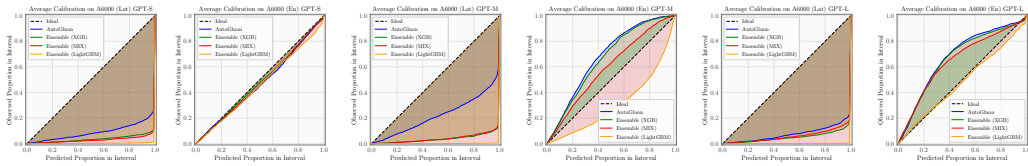

Figure 13: Calibration Areas A6000

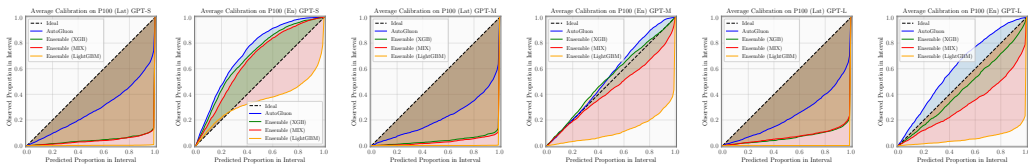

Figure 14: Calibration Areas P100

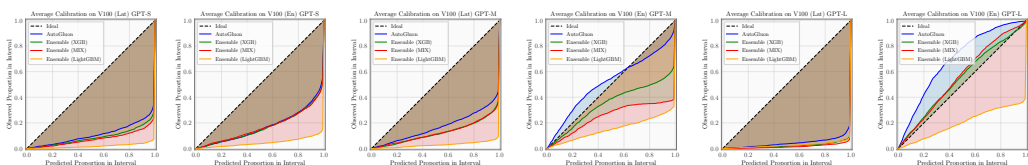

Figure 15: Calibration Areas V100

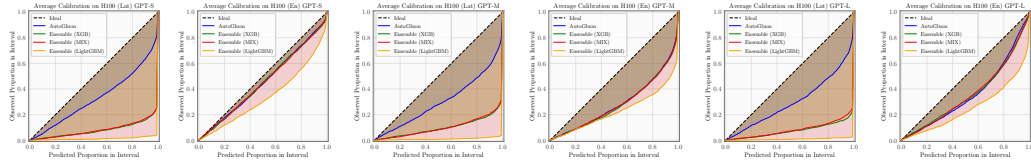

Figure 16: Calibration Areas H100

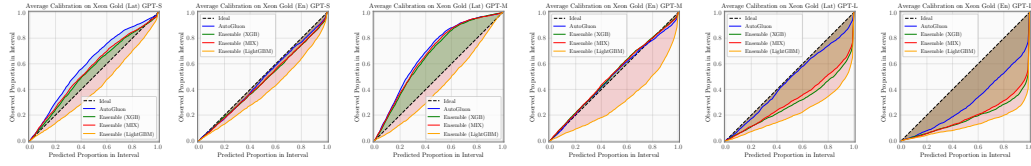

Figure 17: Calibration Areas Xeon Gold

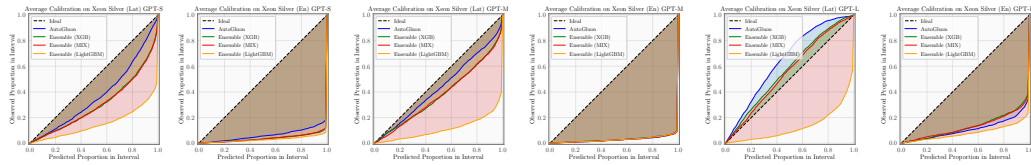

Figure 18: Calibration Areas Xeon Silver

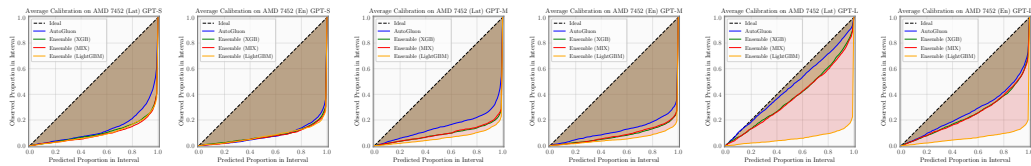

Figure 19: Calibration Areas CPU AMD 7452

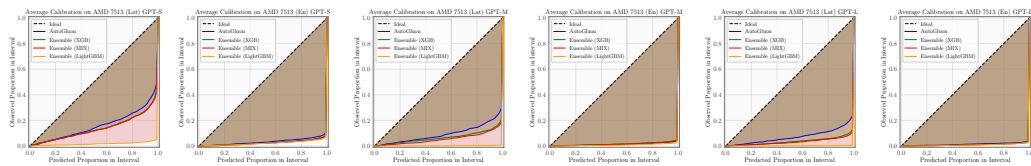

Figure 20: Calibration Areas CPU AMD 7513

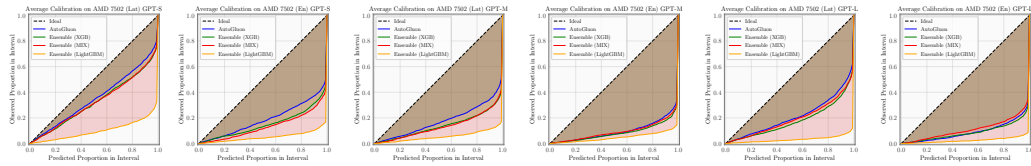

Figure 21: Calibration Areas CPU AMD 7502

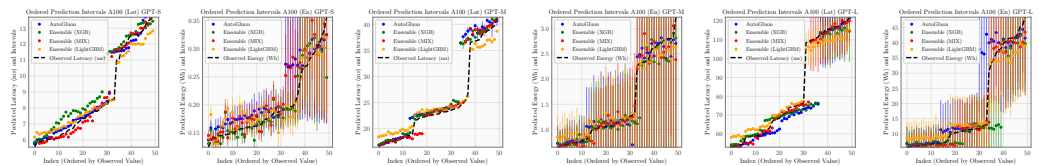

Figure 22: Prediction Intervals A100

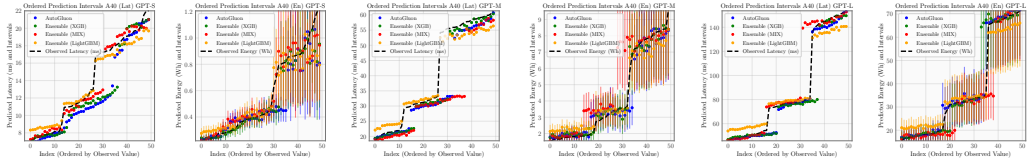

Figure 23: Prediction Intervals A40

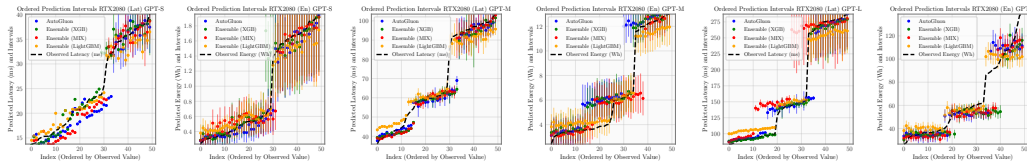

Figure 24: Prediction Intervals RTX2080

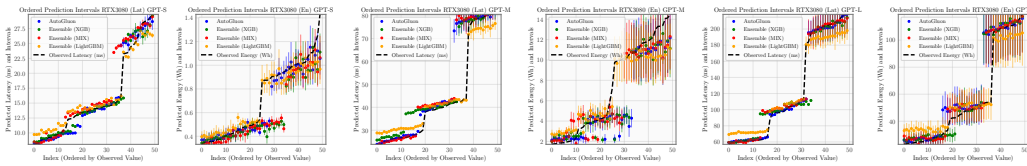

Figure 25: Prediction Intervals RTX3080

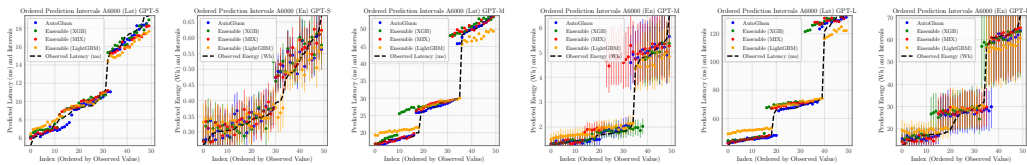

Figure 26: Prediction Intervals A6000

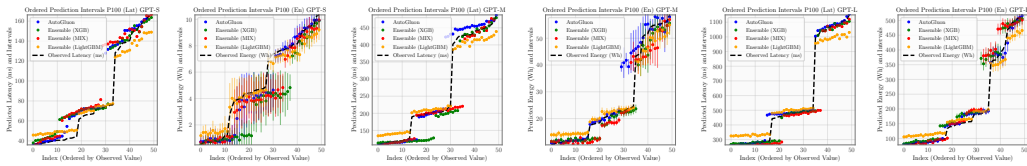

Figure 27: Prediction Intervals P100

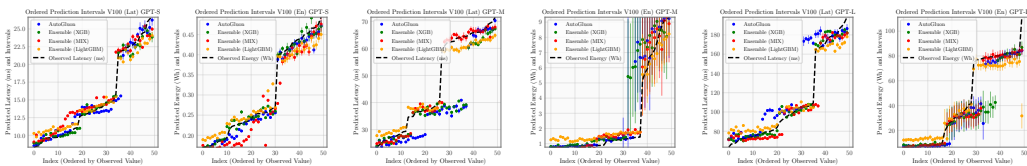

Figure 28: Prediction Intervals V100

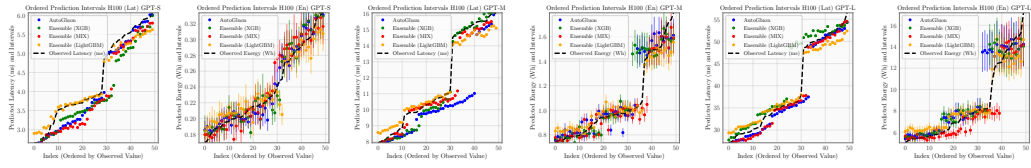

Figure 29: Prediction Intervals H100

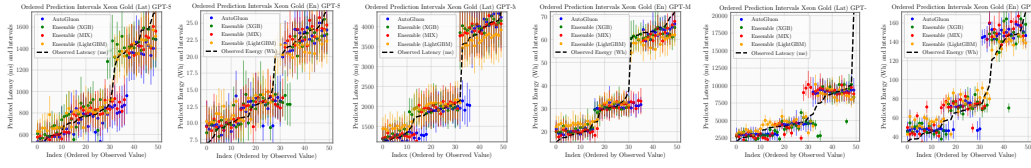

Figure 30: Prediction Intervals Xeon Gold

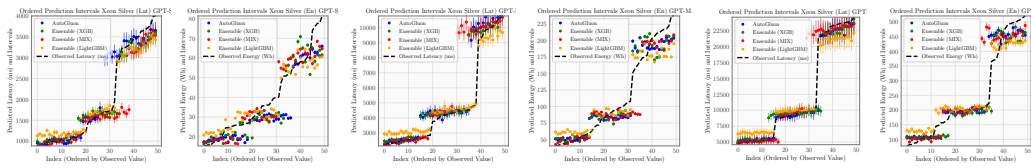

Figure 31: Prediction Intervals Xeon Silver

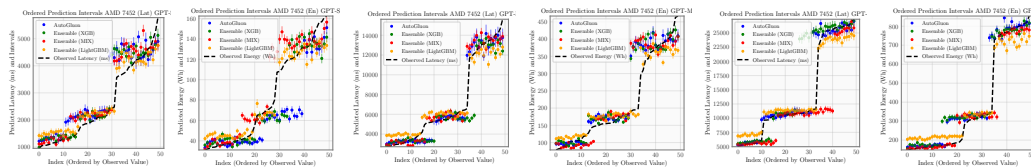

Figure 32: Prediction Intervals CPU AMD 7452

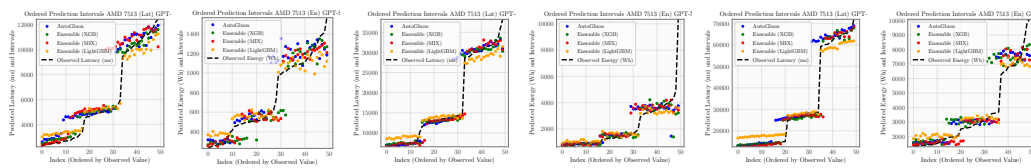

Figure 33: Prediction Intervals CPU AMD 7513

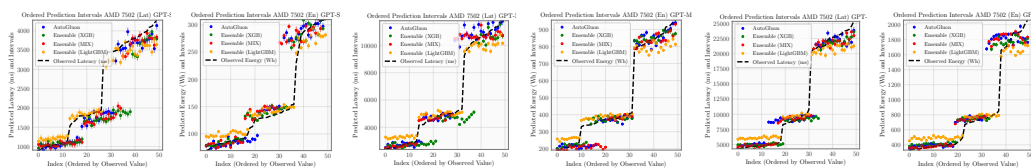

Figure 34: Prediction Intervals CPU AMD 7502

## E Comparison with NAS-Bench-301

Given the immense size of the search spaces (approximately  $10^{36}$ ), training architectures from scratch is impractical. Our work is inspired by surrogate benchmarks such as those proposed by [88]. However, HW-GPT-Bench presents several key differences compared to NB301. First, unlike NB301, which trains architectures from scratch—impractical for larger models and dataset sizes—we utilize an efficient weight-sharing-based supernet. The performance of the inherited subnetwork directly serves as a reliable performance estimation proxy, and these architectures can be fine-tuned if necessary. We also employ a sandwich scheme to train the supernet by sampling the largest, smallest, and a set of random architectures. Second, while NB301 uses the DARTS pre-training pipeline, we introduce three novel search spaces and design a training pipeline specifically for supernet training. Additionally, we focus on the application domain of language modeling, in contrast to NB301’s primary focus on image classification. Lastly, unlike NB301, our work supports a range of hardware devices and provides well-calibrated latency predictions. To our knowledge, we are the first to study the calibration of surrogate models for latency predictions.

## F Importance Analysis

In this section, we provide details on the methods we used throughout the paper to analyze and interpret the data collected from the HW-GPT-Bench search space.

### F.1 OLS Covariate Analysis.

Ordinary Least Squares (OLS) is a statistical method used for estimating the parameters of a linear regression model. The primary goal of OLS is to minimize the sum of the squared residuals, which are the differences between the observed values and the values predicted by the model. In the context of OLS, covariate analysis involves examining the relationships between independent variables (covariates) and the dependent variable. This analysis helps to understand how each covariate contributes to the prediction of the dependent variable and the overall model performance. To fit the linear regression model and conduct the analysis we used `statsmodel.regression.linear_model.OLS`<sup>10</sup>.

#### F.1.1 Key Concepts in OLS

**Linear Regression Model:** The model assumes a linear relationship between the dependent variable  $Y$  (perplexity) and one or more independent variables (covariates). The general form of the model is:

$$Y = \beta_0 + \beta_1 e + \beta_2 l + \sum_{i=1}^l \beta_{i+2} h^i + \sum_{i=1}^l \beta_{i+2+l} m^i + \beta_{2l+3} b + \epsilon,$$

where  $\beta_0$  is the intercept,  $\beta_i$  (for  $i = 1, \dots, 2l + 3$ ) are the coefficients of the covariates, and  $\epsilon$  represents the error term.  $l$  is the number of layers,  $e$  is the embedding dimension,  $m^i$  and  $h^i$  are the MLP ratio and number of heads on layer  $i$ , respectively, and  $b$  is the bias.

**Objective of OLS:** The goal is to estimate the coefficients  $\beta$  such that we minimize the sum of the squared residuals (SSR):

$$SSR = \sum_{i=1}^N (Y_i - \hat{Y}_i)^2,$$

where  $Y_i$  is the observed ground truth perplexity and  $\hat{Y}_i$  is the predicted perplexity by the Linear Regression model.

#### F.1.2 Covariate Analysis

Covariate analysis in the context of OLS involves investigating the effect of each independent variable (embedding dimension, number of layers, etc.) on the dependent variable, i.e. perplexity. This includes:

---

<sup>10</sup><https://www.statsmodels.org/dev/examples/notebooks/generated/ols.html>

- **Estimating Coefficients:** Determining the values of  $\beta_1, \beta_2, \dots, \beta_{2l+3}$  which represent the change in perplexity for a one-unit change in the respective architectural dimension, holding other variables constant.
- **Statistical Significance:** Assessing the significance of each coefficient using t-tests. The null hypothesis  $H_0$  states that the coefficient is zero (no effect). The p-value indicates whether the null hypothesis can be rejected.
- **Standard Errors:** Providing a measure of the variability of the coefficient estimates. Smaller standard errors suggest more precise estimates.
- **Goodness-of-Fit:** Evaluating how well the model explains the variability of perplexity using metrics such as R-squared and adjusted R-squared. R-squared indicates the proportion of the variance in perplexity that is predictable from the independent variables.

The results of the OLS analysis for perplexity on the collected samples are presented below. These results include:

1. **Coefficients ( $\beta$ ):** Estimates for each covariate.
2. **Standard Errors:** Indicate the precision of the coefficient estimates.
3. **t-Values:** Used to test the hypothesis that a coefficient is significantly different from zero.
4. **P-Values:** Indicate the significance level of each coefficient.
5. **R<sup>2</sup>:** The proportion of the variance in the dependent variable explained by the model.
6. **Adjusted R-squared:** Adjusted for the number of predictors in the model, providing a more accurate measure of goodness-of-fit for models with multiple covariates.

```

=====
                        OLS Regression Results GPT-L
=====
Dep. Variable:          perplexity    R-squared:                0.901
Model:                  OLS           Adj. R-squared:          0.901
Method:                 Least Squares  F-statistic:             1.817e+04
No. Observations:      10000        AIC:                     3.395e+04
Df Residuals:          9994         BIC:                     3.399e+04
Df Model:               5
Covariance Type:       nonrobust
=====

```

|                | coef    | std err | t        | P> t  | [0.025 | 0.975] |
|----------------|---------|---------|----------|-------|--------|--------|
| const          | 23.6263 | 0.013   | 1788.886 | 0.000 | 23.600 | 23.652 |
| num_layers     | -0.0426 | 0.013   | -3.227   | 0.001 | -0.069 | -0.017 |
| embed_dim      | -3.9787 | 0.013   | -301.209 | 0.000 | -4.005 | -3.953 |
| mean_mlp_ratio | -0.1164 | 0.013   | -8.812   | 0.000 | -0.142 | -0.091 |
| mean_heads     | -0.0612 | 0.013   | -4.634   | 0.000 | -0.087 | -0.035 |
| bias           | -0.0630 | 0.013   | -4.769   | 0.000 | -0.089 | -0.037 |

```

=====
Omnibus:                75511.319    Durbin-Watson:           2.026
Prob(Omnibus):          0.000      Jarque-Bera (JB):       1537.046
Skew:                   -0.635     Prob(JB):               0.00
Kurtosis:               1.559      Cond. No.               1.03
=====

```

```

=====
                        OLS Regression Results GPT-M
=====
Dep. Variable:          perplexity    R-squared:                0.914
Model:                  OLS           Adj. R-squared:          0.914
Method:                 Least Squares  F-statistic:             2.117e+04
No. Observations:      10000        AIC:                     3.791e+04
Df Residuals:          9994         BIC:                     3.796e+04

```



| Df Model:        |         | 5         |                   |       |          |        |
|------------------|---------|-----------|-------------------|-------|----------|--------|
| Covariance Type: |         | nonrobust |                   |       |          |        |
|                  | coef    | std err   | t                 | P> t  | [0.025   | 0.975] |
| const            | 28.1305 | 0.016     | 1747.009          | 0.000 | 28.099   | 28.162 |
| num_layers       | -0.0983 | 0.016     | -6.104            | 0.000 | -0.130   | -0.067 |
| embed_dim        | -5.2315 | 0.016     | -324.795          | 0.000 | -5.263   | -5.200 |
| mean_mlp_ratio   | -0.1445 | 0.016     | -8.975            | 0.000 | -0.176   | -0.113 |
| mean_heads       | -0.0744 | 0.016     | -4.623            | 0.000 | -0.106   | -0.043 |
| bias             | -0.0650 | 0.016     | -4.035            | 0.000 | -0.097   | -0.033 |
| Omnibus:         |         | 66013.096 | Durbin-Watson:    |       | 2.021    |        |
| Prob(Omnibus):   |         | 0.000     | Jarque-Bera (JB): |       | 1509.031 |        |
| Skew:            |         | -0.600    | Prob(JB):         |       | 0.00     |        |
| Kurtosis:        |         | 1.524     | Cond. No.         |       | 1.03     |        |

### OLS Regression Results GPT-S

| Dep. Variable:    |         | perplexity    |                   | R-squared:      |           | 0.949     |  |
|-------------------|---------|---------------|-------------------|-----------------|-----------|-----------|--|
| Model:            |         | OLS           |                   | Adj. R-squared: |           | 0.949     |  |
| Method:           |         | Least Squares |                   | F-statistic:    |           | 3.754e+04 |  |
| No. Observations: |         | 10000         |                   | AIC:            |           | 3.667e+04 |  |
| Df Residuals:     |         | 9994          |                   | BIC:            |           | 3.671e+04 |  |
| Df Model:         |         | 5             |                   |                 |           |           |  |
| Covariance Type:  |         | nonrobust     |                   |                 |           |           |  |
|                   | coef    | std err       | t                 | P> t            | [0.025    | 0.975]    |  |
| const             | 32.3973 | 0.015         | 2141.130          | 0.000           | 32.368    | 32.427    |  |
| num_layers        | -0.4912 | 0.015         | -32.459           | 0.000           | -0.521    | -0.462    |  |
| embed_dim         | -6.5321 | 0.015         | -431.656          | 0.000           | -6.562    | -6.502    |  |
| mean_mlp_ratio    | -0.2199 | 0.015         | -14.530           | 0.000           | -0.250    | -0.190    |  |
| mean_heads        | -0.2739 | 0.015         | -18.096           | 0.000           | -0.304    | -0.244    |  |
| bias              | -0.0251 | 0.015         | -1.661            | 0.097           | -0.055    | 0.005     |  |
| Omnibus:          |         | 88675.889     | Durbin-Watson:    |                 | 2.044     |           |  |
| Prob(Omnibus):    |         | 0.000         | Jarque-Bera (JB): |                 | 1321.623  |           |  |
| Skew:             |         | -0.544        | Prob(JB):         |                 | 1.03e-287 |           |  |
| Kurtosis:         |         | 1.589         | Cond. No.         |                 | 1.03      |           |  |

## F.2 Power-laws for GPT-wide spaces

We define the power-law fits for GPT-wide spaces below. Similar to the observation in 4, we see that the embedding size has the most effect on perplexity, followed by number of layers, mlp expansion ratio and number of heads. The bias plays a minimal role in determining perplexity of an architecture.

$$\text{GPT-S-wide: } y = 1116.453 \cdot l^{-0.212} \cdot e^{-0.3770} \cdot m^{-0.0514} \cdot h^{-0.0647} \cdot b^{-0.000190},$$

$$\text{GPT-M-wide: } y = 618.0753 \cdot l^{-0.1795} \cdot e^{-0.3401} \cdot m^{-0.0711} \cdot h^{-0.0556} \cdot b^{-0.0050},$$

$$\text{GPT-L-wide: } y = 498.9920 \cdot l^{-0.1659} \cdot e^{-0.3204} \cdot m^{-0.0692} \cdot h^{-0.053} \cdot b^{-0.0081}.$$

## F.3 Recursive Feature Elimination

Recursive Feature Elimination (RFE) is a feature selection method used in machine learning to identify the most relevant features in a dataset. It works by recursively fitting a model and removing the least important feature(s) based on model coefficients or importance scores until the maximum

number of features is reached. Features in our case are the architectural choices, i.e. embedding dimension size, number of layers, etc. The process involves the following steps:

1. **Model Fitting:** The model is initially trained on the entire set of features.
2. **Feature Ranking:** Features are ranked based on their importance scores derived from the fitted model.
3. **Feature Elimination:** The least important feature(s) are removed from the dataset.
4. **Repetition:** Steps 1-3 are repeated recursively on the pruned feature set until the desired number of features is reached or only a single feature remains.

We implement RFE using `sklearn`<sup>11</sup>, which provides an efficient and easy-to-use RFE function. We employ a `RandomForest` regressor as the base model due to its ability to handle high-dimensional data and capture non-linear relationships. Specifically, we use a `RandomForest` regressor with 50 estimators, which balances model complexity and computational efficiency. In Figures 35, 36 and 37, we present the ranking of all search space dimensions for GPT-S, GPT-M and GPT-L spaces.

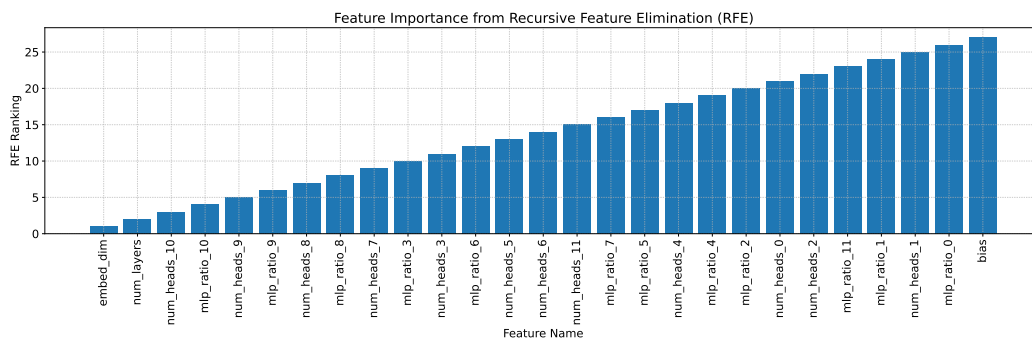

Figure 35: Detailed feature ranking from RFE for GPT-S.

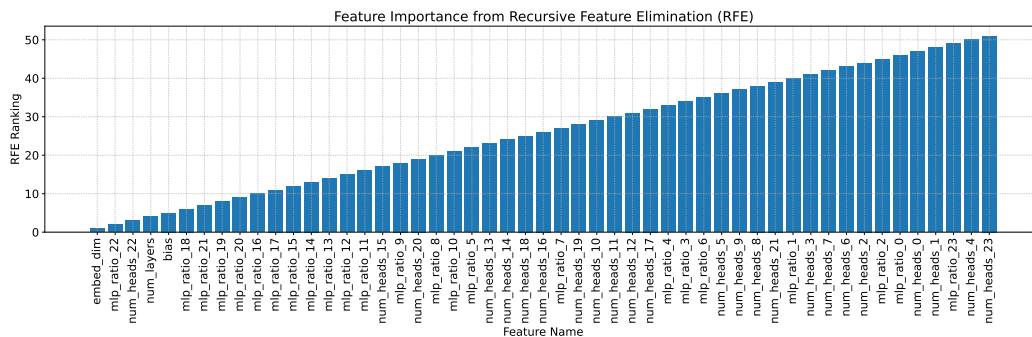

Figure 36: Detailed feature ranking from RFE for GPT-M.

## G Details on Empirical Attainment Function (EAF)

Running multi-objective optimization algorithms multiple times can yield different Pareto fronts. Computing uncertainty estimates of Pareto fronts over multiple runs of an algorithm is important to ensure that we appropriately compare different algorithms in a statistically meaningful way. Simply superimposing the Pareto fronts across multiple runs is insufficient in depicting how the Pareto fronts tend to vary. The Empirical Attainment Function (EAF) [25, 47] is a statistical measure used in

<sup>11</sup>[https://scikit-learn.org/stable/auto\\_examples/feature\\_selection/plot\\_rfe\\_digits.html](https://scikit-learn.org/stable/auto_examples/feature_selection/plot_rfe_digits.html)

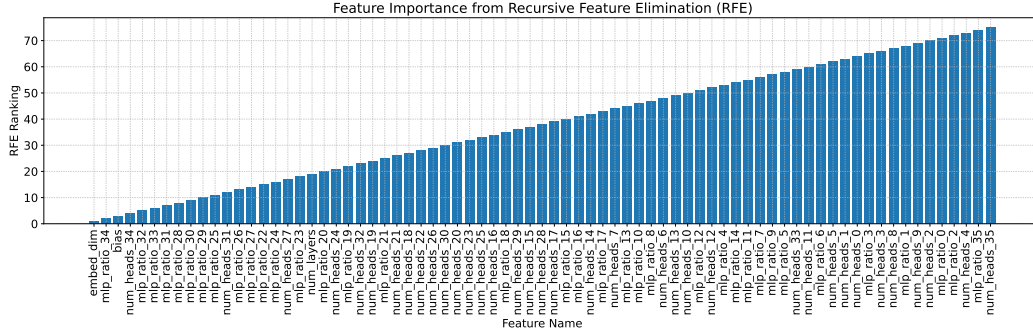

Figure 37: Detailed feature ranking from RFE for GPT-L.

multi-objective optimization to describe the distribution of outcomes achieved by an optimization algorithm over multiple runs. It provides a way to empirically estimate the probability that a given point in the objective space is attained (i.e., dominated or matched) by the solutions generated by the algorithm.

For two solution vectors of the multi-objective function,  $\mathbf{y}$  and  $\mathbf{z}$ ,  $\mathbf{y}$  weakly dominates  $\mathbf{z}$  ( $\mathbf{y} \preceq \mathbf{z}$ ) if the following conditions hold:

1. **Not worse on any objective:**  $\mathbf{y}$  is at least as good as  $\mathbf{z}$  on all objectives. This means for each objective function, the value in  $\mathbf{y}$  is either equal to or better than the corresponding value in  $\mathbf{z}$ .
2. **Strictly better on at least one objective (or indifferent on all):**  $\mathbf{y}$  must be strictly better than  $\mathbf{z}$  on at least one objective function. Alternatively, it can be equal on all objectives.

Given a set of Pareto fronts  $\{F^1, \dots, F^n\}$  obtained from  $n$  independent runs with different random seeds, the EAF is defined by the following empirical attainment function:

$$\varepsilon(\mathbf{z}) = \frac{1}{n} \sum_{i=1}^n \mathbb{I}[F^i \preceq \mathbf{z}],$$

where  $\varepsilon(\mathbf{z})$  represents the EAF value for a specific objective vector  $\mathbf{z}$  in the objective space.  $\mathbb{I}[F^i \preceq \mathbf{z}]$  is an indicator function that is 1 if the objective vector  $\mathbf{z}$  is weakly dominated by the  $F^i$ , i.e. the Pareto front from the  $i$ -th run, and 0 otherwise.  $F^i \preceq \mathbf{z}$  means that there exists at least an objective vector  $\mathbf{y}$  in  $F^i$  at least as good as  $\mathbf{z}$ . This doesn't necessarily mean every single run achieved a better outcome than  $\mathbf{z}$ , but at least one did. In simpler terms, the EAF value at a given objective vector  $\mathbf{z}$  represents the portion of independent runs where a Pareto front achieved at least that good of an objective vector (weakly dominated  $\mathbf{z}$ ).

The EAF can be used to visualize uncertainty in the Pareto front by plotting different EAS levels. For example,  $S^{1/2}$  represents the set of objective vectors that are weakly dominated by at least half of the independent runs (50% EAF level). To compute the Empirical Attainment Surfaces (EAS) in this paper we used the implementation from Watanabe [80]<sup>12</sup>.

## H Inheriting v/s Finetuning Subnetworks

We validate the effectiveness of out perplexity surrogate by inheriting randomly sampled 100 subnetworks and comparing the correlation between the perplexity on simply inheriting the subnetworks v/s finetuning the subnetworks further upon inheritance for 5000 update steps. We observe that the inherited subnetwork performance strongly correlates with fine-tuned subnetworks as indicated by Table 11.

## I Distribution of Architecture Latencies

We fit a kernel-density-estimator to the collected subnetwork latencies. As observed in Figure 38 and 39, the distribution of CPU latency is more noisier than GPU latency.

<sup>12</sup><https://github.com/nabenabe0928/empirical-attainment-func>

| Supernet | Kendall-Tau |
|----------|-------------|
| GPT-S    | 0.9626      |
| GPT-M    | 0.9580      |
| GPT-L    | 0.9286      |

Table 11: Kendall-Tau values between perplexities after inheriting and perplexities after finetuning (for 5000 steps) for different Supernets for a set of 100 random architectures

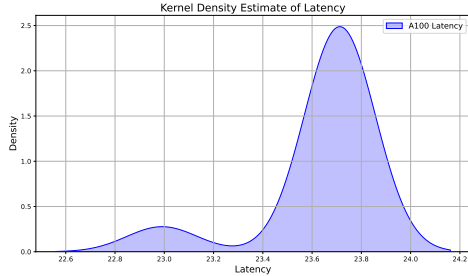

Figure 38: GPU-A100

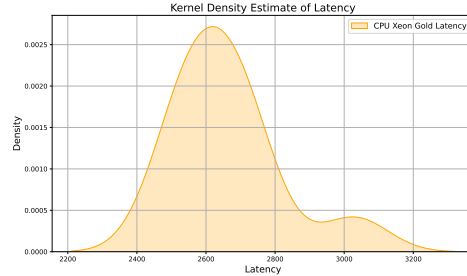

Figure 39: CPU-Xeon Gold

Figure 40: Distribution of Latencies on different devices

## J Scatter Plots for GPT-wide

We introduced 4 new search spaces (with more widely spaced choices), mainly GPT-S-wide, GPT-M-wide, GPT-L-wide and GPT-XL-wide and present the scatter plots on the collected ground truth subnetworks for these spaces in Figure 41.

## K Multi-objective NAS algorithms

In this section, we provide more details on the multi-objective NAS methods we run on HW-GPT-Bench in Section 5. We use their implementation in SyneTune [62]<sup>13</sup>.

- **Random Search (RS).** RS has been shown to be a strong baseline for single [40] and multi-objective [10, 31, 69] architecture search. For this baseline we sample architectures uniformly at random from the search space and then compute the Pareto-Front from these architecture samples. In larger search space, random search, while being embarrassingly parallel and often performant, is not guaranteed to yield the optimal architectures.
- **Multi-Objective Regularized Evolution Algorithm (MOREA).** Regularized Evolution (RE) or Aging Evolution [59] has been quite successfully applied for neural architecture search. Regularized Evolution works by evolving a population of candidates using mutation and periodically discarding the oldest members of the population, inducing a *regularization* effect. In SyneTune RE is extended to Multi-Objective Regularized Evolution (MOREA) by scoring the population via a multi-objective priority based on non-dominated sorting. Parents are then be sampled from the population based on this priority score.
- **Non-dominated Sorting Genetic Algorithm II (NSGA-II).** NSGA-II [16], is a multi-objective evolutionary algorithm to obtain a Pareto-Set of architectures. It employs non-dominated sorting to rank architectures based on their dominance relationships and **crowding distance** to maintain a diverse population. Through selection, crossover, and mutation, NSGA-II iteratively evolves populations toward the Pareto front, offering a range of trade-off solutions.
- **Local Search (LS).** SyneTune adapts LS to explore the vicinity of Pareto-optimal points in multi-objective optimization problems, aiming to iteratively refine Pareto-optimal solutions within defined neighborhoods. The method is described in more detail in Klein et al. [36].
- **Bayesian Optimization with Random Scalarizations (RSBO).** RSBO [55] uses an acquisition function that takes as input multiple random scalarizations of the objectives being optimized, to obtain the Pareto-optimal set which minimizes the Bayesian regret.

<sup>13</sup>[https://syne-tune.readthedocs.io/en/latest/getting\\_started.html#supported-multi-objective-optimization-methods](https://syne-tune.readthedocs.io/en/latest/getting_started.html#supported-multi-objective-optimization-methods)

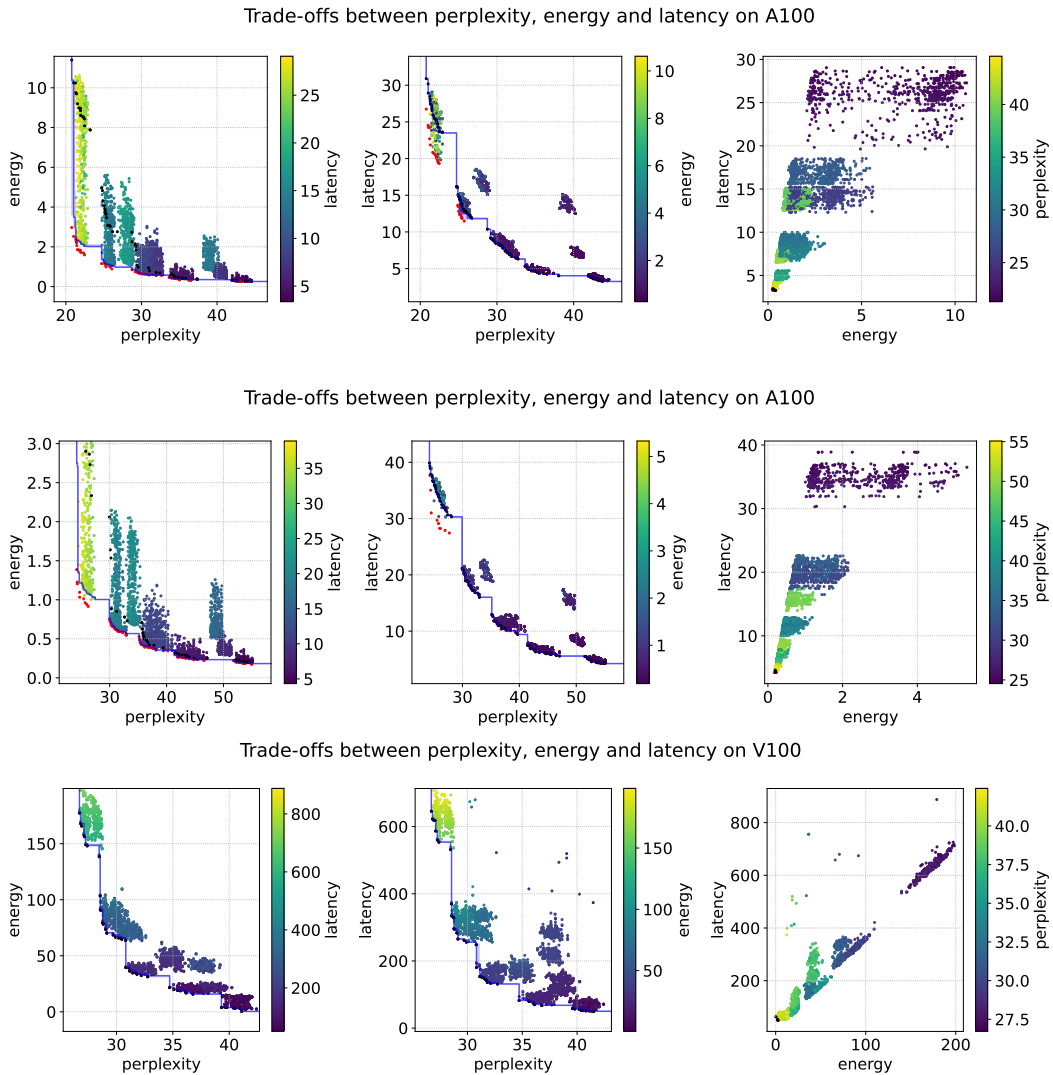

Figure 41: Trade-off scatter plots for GPT-M-wide, GPT-L-wide and GPT-XL-wide

- **Bayesian Optimization with Linear Scalarizations (LSBO).** Similar to RSBO, this method optimizes a single objective corresponding to a fixed linear combination of two objectives instead of randomizing the scalarizations at each BO iteration.
- **Expected Hypervolume Improvement (EHVI).** EHVI [15] is a Bayesian optimization method with an acquisition function designed to efficiently explore the Pareto front in multi-objective optimization problems. It quantifies the expected improvement in hypervolume, which measures the volume of the objective space dominated by Pareto-optimal solutions, that a candidate solution can offer. EHVI guides the search towards regions of the objective space likely to contain better trade-offs, aiding in the discovery of diverse Pareto-optimal solutions.
- **Multi-objective Asynchronous Successive Halving (MOASHA).** MOASHA [65] is a multi-fidelity approach that leverages an asynchronous successive halving scheduler [41] along with non-dominating sorting for budget allocation. It employs the NSGA-II selection mechanism and the  $\epsilon$ -net [63] exploration strategy, which ranks candidates within the same Pareto set by iteratively choosing the one with the greatest Euclidean distance from the previously selected candidates.

## L Additional experiments with MOO methods

In addition to the results presented in the paper we also run MOO methods on our benchmark for latencies and perplexity across different devices and search spaces in Figures 42-54. We present the EAFs resulting from running the baselines for multiple seeds and the hypervolume of the baselines

over the number of surrogate evaluations. Furthermore, we also present the results of running different MOO methods on the energy-perplexity objectives for different devices on GPT-L in Figures 55-59. Interestingly for these two objectives local search is often very performant at higher budgets, outperforming other baselines like NSGA-2 and EHV1.

### L.1 Experiments with 2 Objectives

We observe from Figures 42-59 that NSGA-II and EHV1 are amongst the top performing methods (even at lower budgets). LS typically has a low hypervolume in the beginning, however, often outperforms other methods with enough budget.

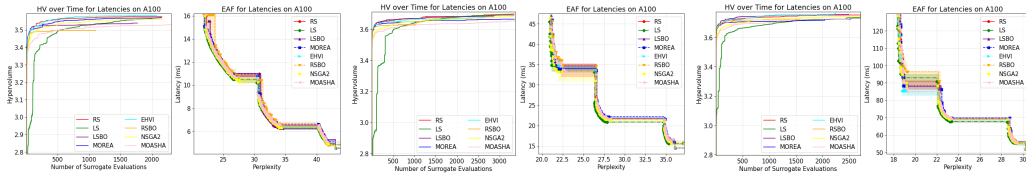

Figure 42: Pareto fronts and HV over time on A100 for GPT-S (first two), GPT-M (second two) and GPT-L (last two).

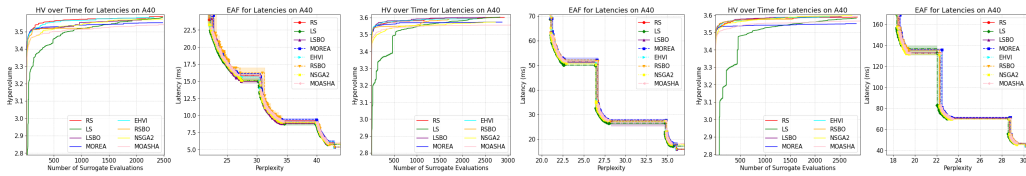

Figure 43: Pareto fronts and HV over time on A40 for GPT-S (first two), GPT-M (second two) and GPT-L (last two).

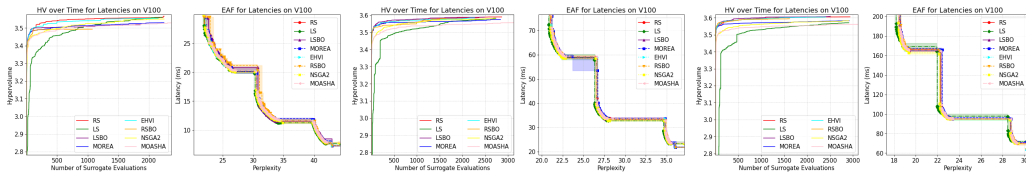

Figure 44: Pareto fronts and HV over time on V100 for GPT-S (first two), GPT-M (second two) and GPT-L (last two).

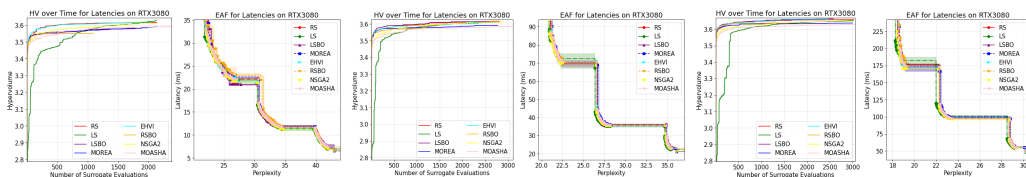

Figure 45: Pareto fronts and HV over time on RTX3080 for GPT-S (first two), GPT-M (second two) and GPT-L (last two).

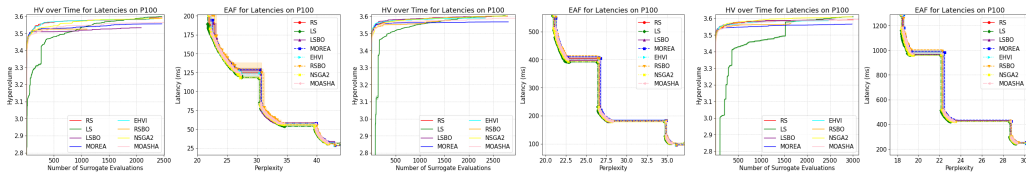

Figure 46: Pareto fronts and HV over time on P100 for GPT-S (first two), GPT-M (second two) and GPT-L (last two).

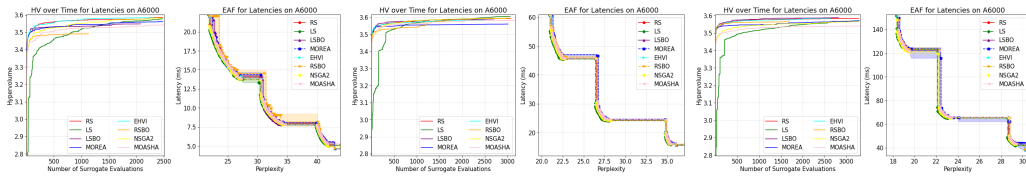

Figure 47: Pareto fronts and HV over time on A6000 for GPT-S (first two), GPT-M (second two) and GPT-L (last two).

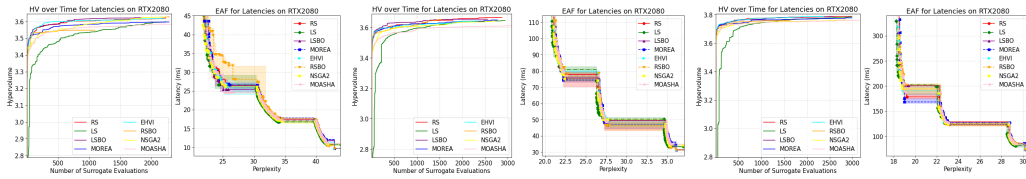

Figure 48: Pareto fronts and HV over time on RTX2080 for GPT-S (first two), GPT-M (second two) and GPT-L (last two).

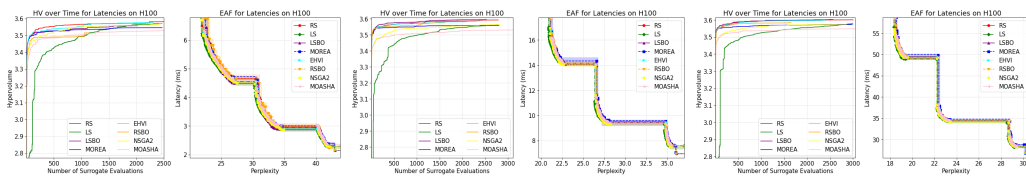

Figure 49: Pareto fronts and HV over time on H100 for GPT-S (first two), GPT-M (second two) and GPT-L (last two).

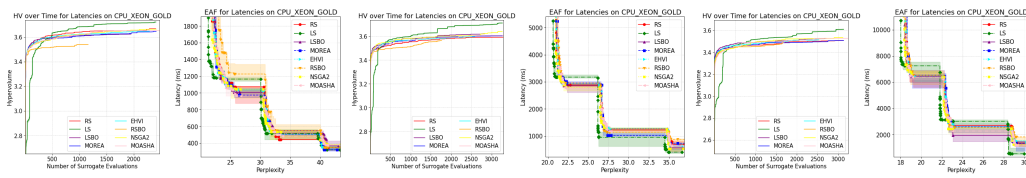

Figure 50: Pareto fronts and HV over time on CPU Xeon Gold for GPT-S (first two), GPT-M (second two) and GPT-L (last two).

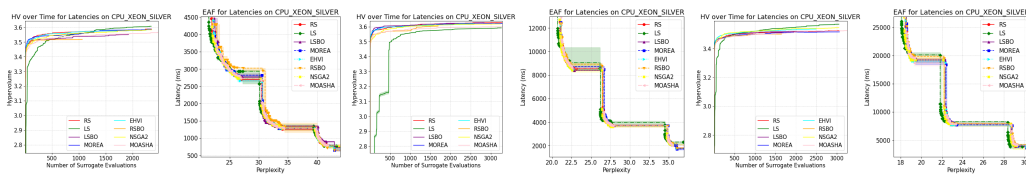

Figure 51: Pareto fronts and HV over time on CPU Xeon Silver for GPT-S (first two), GPT-M (second two) and GPT-L (last two).

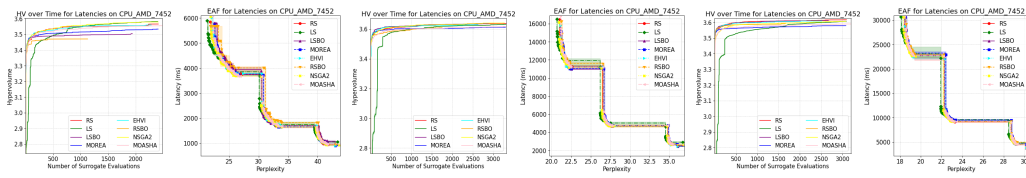

Figure 52: Pareto fronts and HV over time on CPU AMD 7452 for GPT-S (first two), GPT-M (second two) and GPT-L (last two).

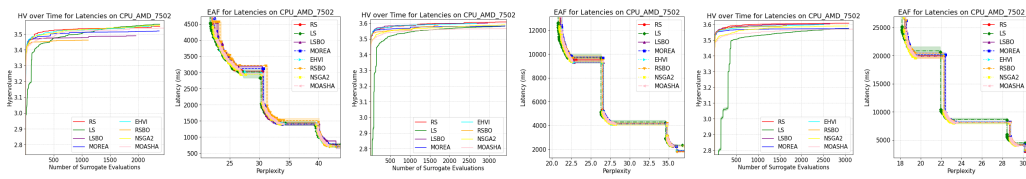

Figure 53: Pareto fronts and HV over time on CPU AMD 7402 for GPT-S (first two), GPT-M (second two) and GPT-L (last two).

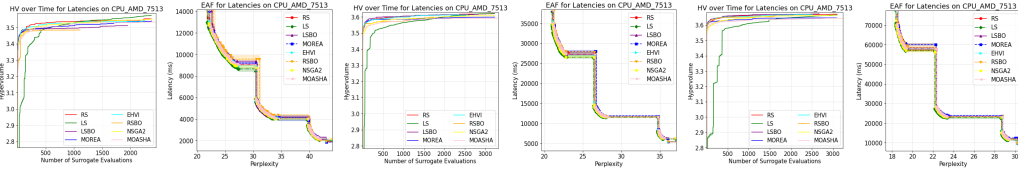

Figure 54: Pareto fronts and HV over time on CPU AMD 7513 for GPT-S (first two), GPT-M (second two) and GPT-L (last two).

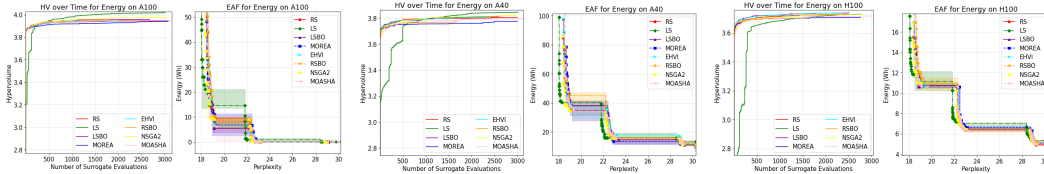

Figure 55: Pareto Fronts and HV on A100 (first 2), A40 (second 2) and H100 (last 2) for GPT-L

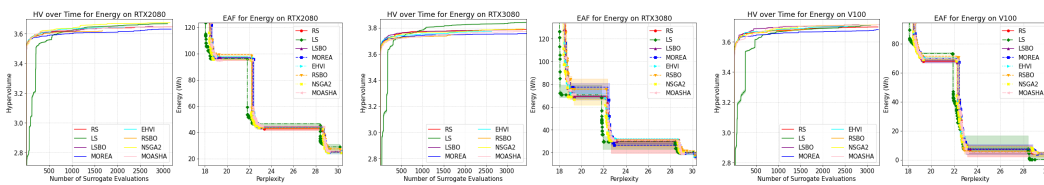

Figure 56: Pareto Fronts and HV on RTX2080 (first 2), RTX3080 (second 2) and V100 (last 2) for GPT-L

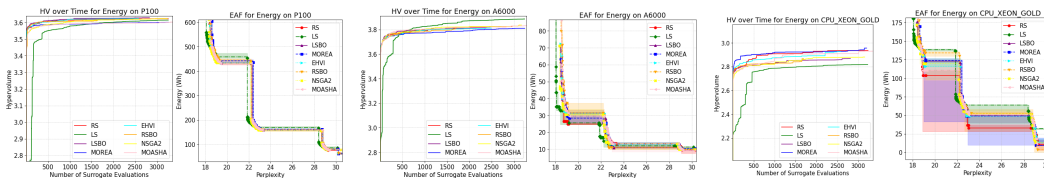

Figure 57: Pareto Fronts and HV on P100 (first 2), A6000 (second 2) and Xeon Gold CPU (last 2) for GPT-L

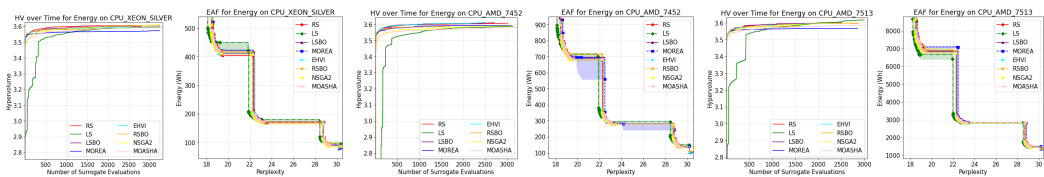

Figure 58: Pareto Fronts and HV on Xeon Silver (first 2), AMD 7452 (second 2) and AMD 7513 (last 2) for GPT-L

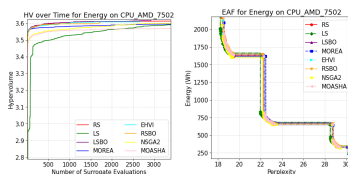

Figure 59: Pareto Fronts and HV on AMD 7502 for GPT-L.



## L.2 Experiments with 3 Objectives

In addition, we also use our benchmark to optimize energies and latencies, in conjunction with perplexity, on different devices for the GPT-L space, as presented in Figure 60 and Figure 61. We run these experiments for a smaller time budget of 3 hours using SyneTune. We observe that at smaller time budgets random search and MOO methods based on Bayesian optimization are the top methods.

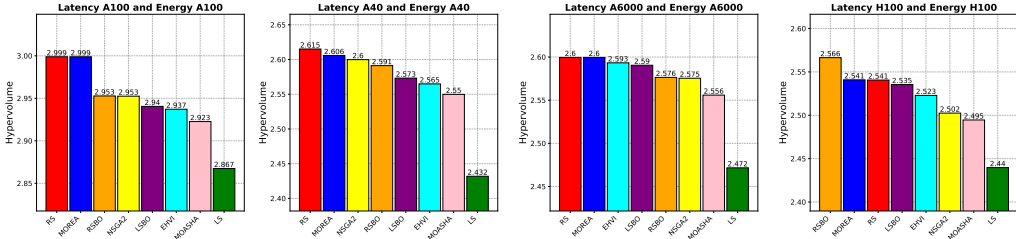

Figure 60: Hypervolumes of baselines optimizing for perplexity, latency and energy usage on A100, A40, A6000 and H100.

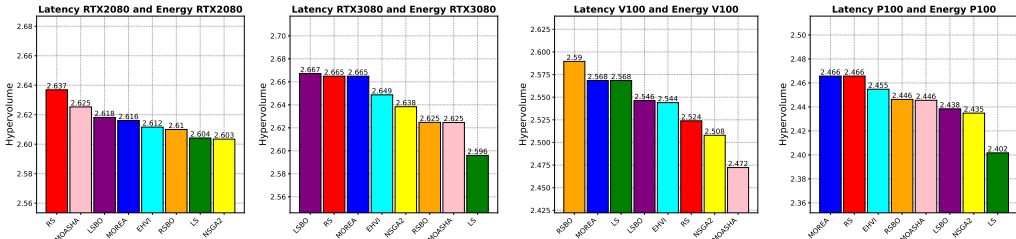

Figure 61: Hypervolumes of baselines optimizing for perplexity, latency and energy usage on RTX2080, RTX3080, V100 and P100.

## M Correlations between different metrics

Figures 62, 63, 64 show the Kendall- $\tau$  rank correlation coefficient across all the metrics supported in HW-GPT-Bench. Given two sets of  $n$  observations  $\{y_i\}_{i=1}^n$  and  $\{z_i\}_{i=1}^n$ , the  $\tau$  coefficient is computed as:

$$\tau = \frac{C - D}{\frac{1}{2}n(n - 1)},$$

where  $C$  and  $D$  are the number of concordant and discordant pairs, respectively. For every pair  $(i, j)$  where  $1 \leq i < j \leq n$ :

1. A pair is **concordant** if the order of both elements in the pair is the same in both datasets:  $(y_i < y_j \text{ and } z_i < z_j)$  or  $(y_i > y_j \text{ and } z_i > z_j)$ .
2. A pair is **discordant** if the order of the elements in the pair is different in the two datasets:  $(y_i < y_j \text{ and } z_i > z_j)$  or  $(y_i > y_j \text{ and } z_i < z_j)$ .

To compute these values, we use the same 10k ( $n = 10000$ ) ground truth observations that we use to train the surrogate models. For metrics that contain multiple observations, such as latency and energy usage, we use the median value. For easier visualization, we stratify the aforementioned correlation plots by metrics relevant to GPUs (Figures 68, 69, 70) and CPUs (Figures 65, 66, 67).

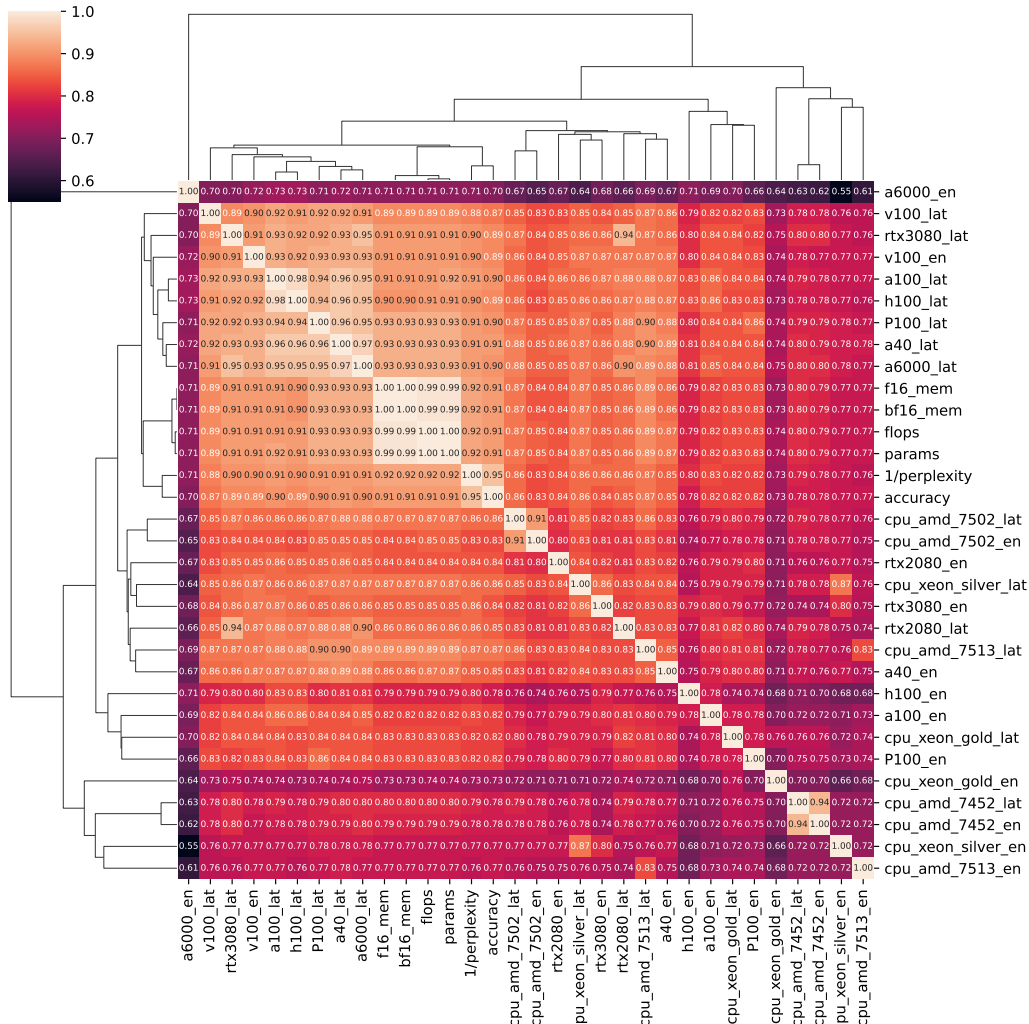

Figure 62: Cross-Metric kendall-tau correlation plots for GPT-S

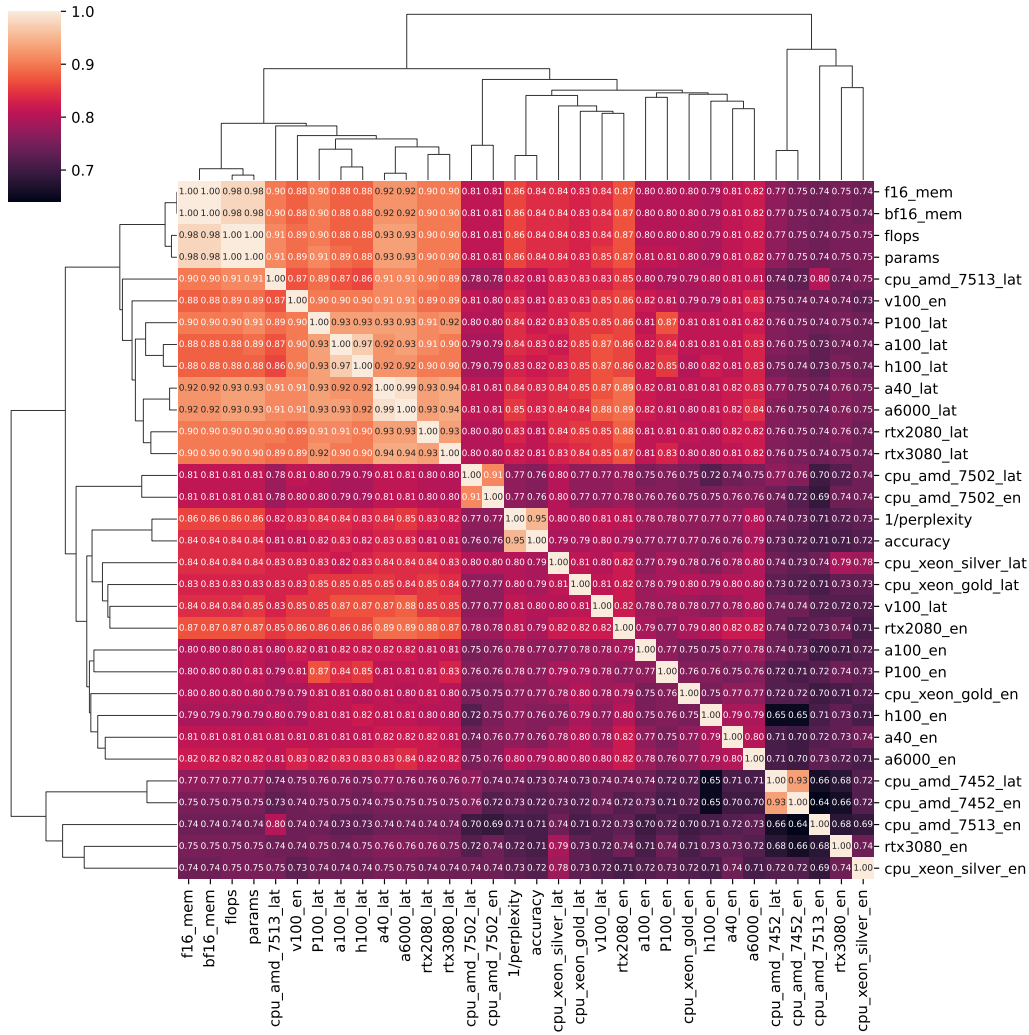

Figure 63: Cross-metric Kendall- $\tau$  correlation plots for GPT-M.

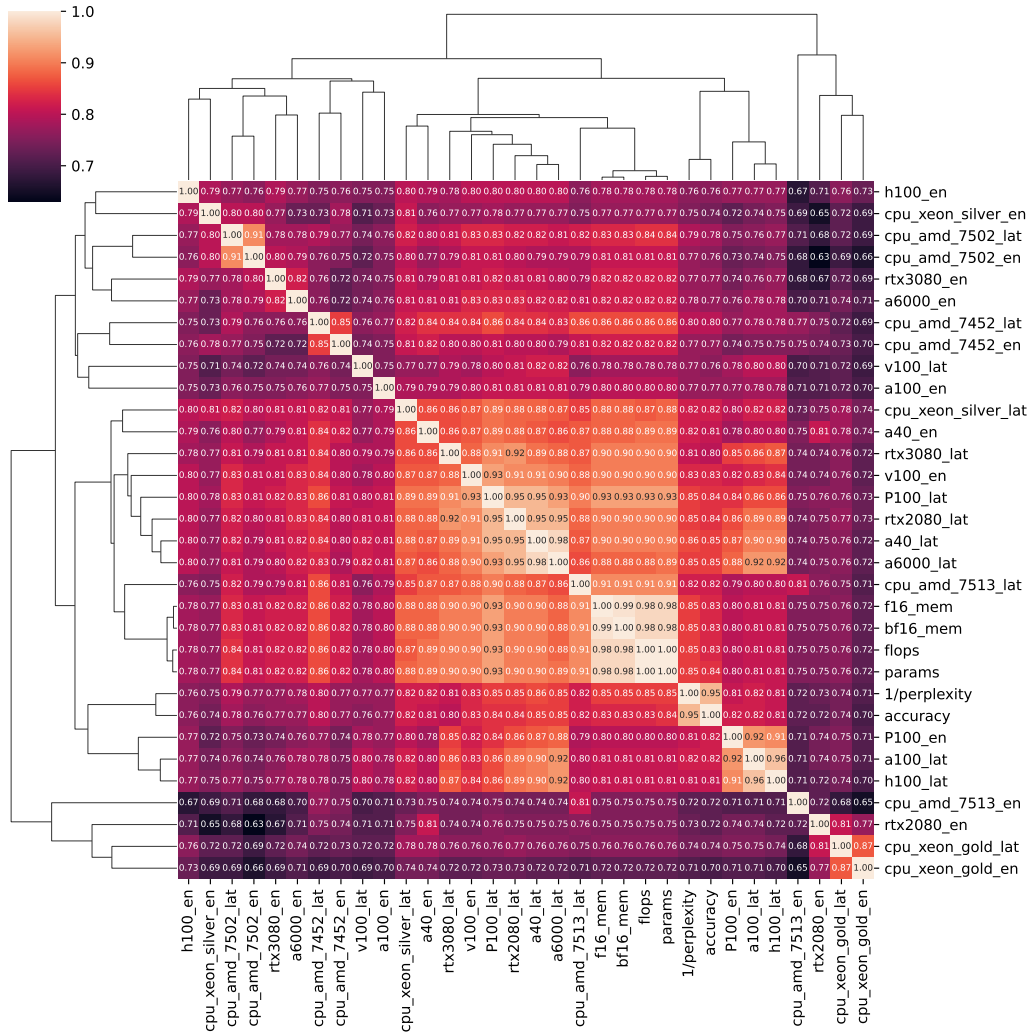

Figure 64: Cross-metric Kendall- $\tau$  correlation plots for GPT-L.

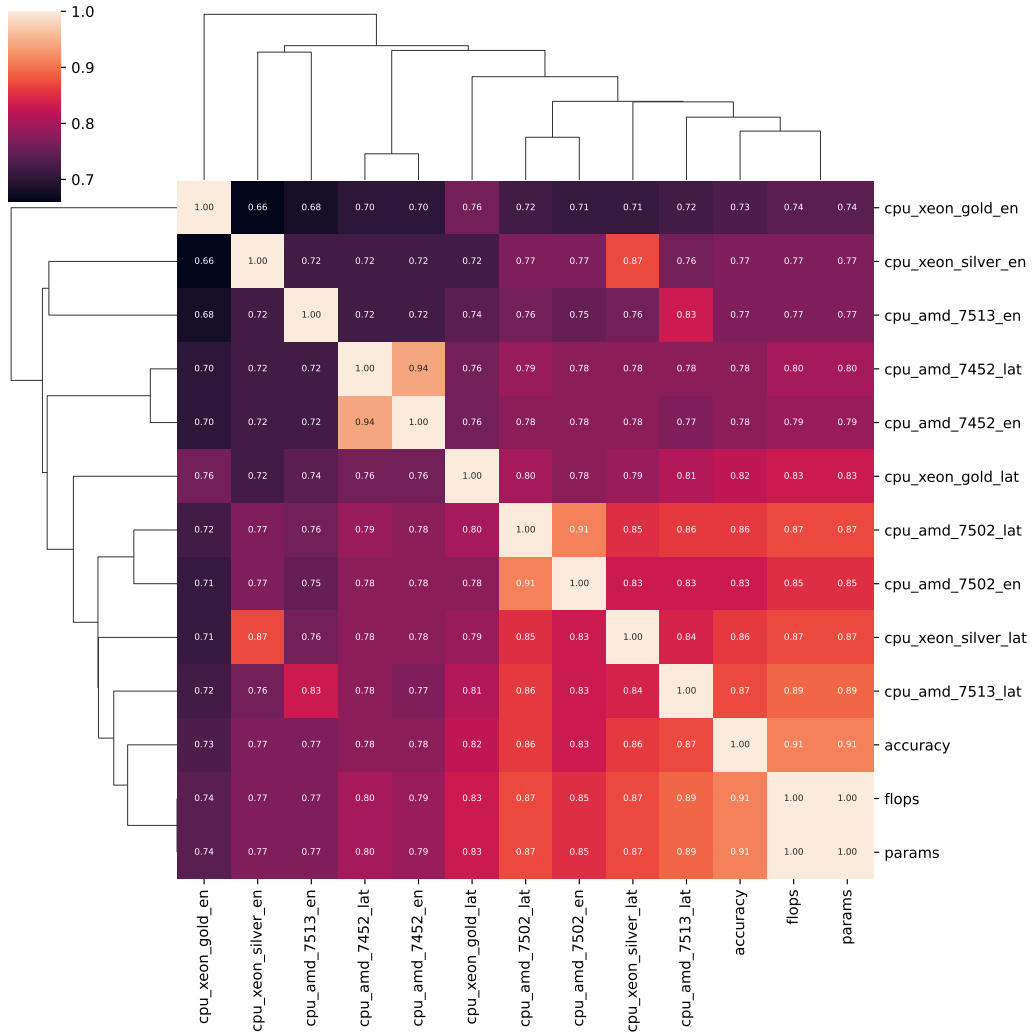

Figure 65: Cross-metric Kendall- $\tau$  correlation plots for GPT-S (only CPU devices).

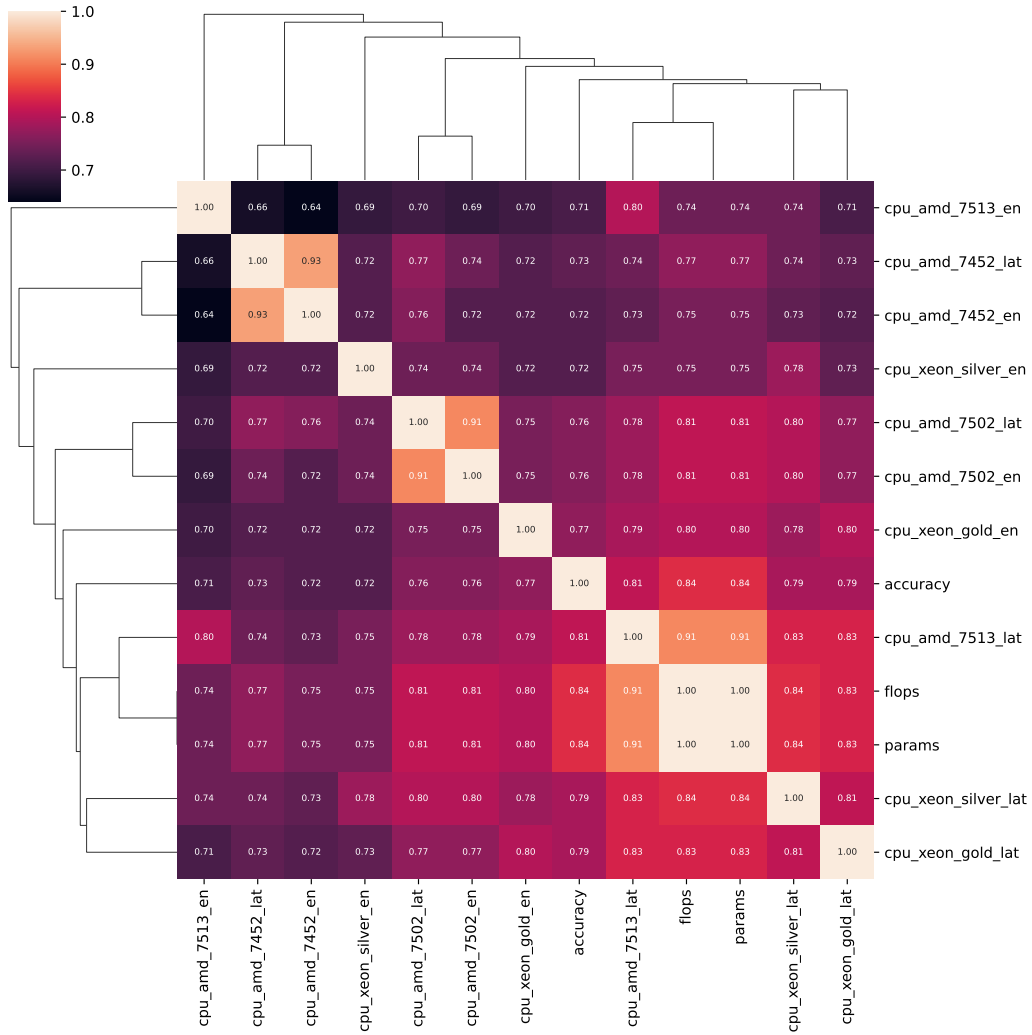

Figure 66: Cross-metric Kendall- $\tau$  correlation plots for GPT-M (only CPU devices).

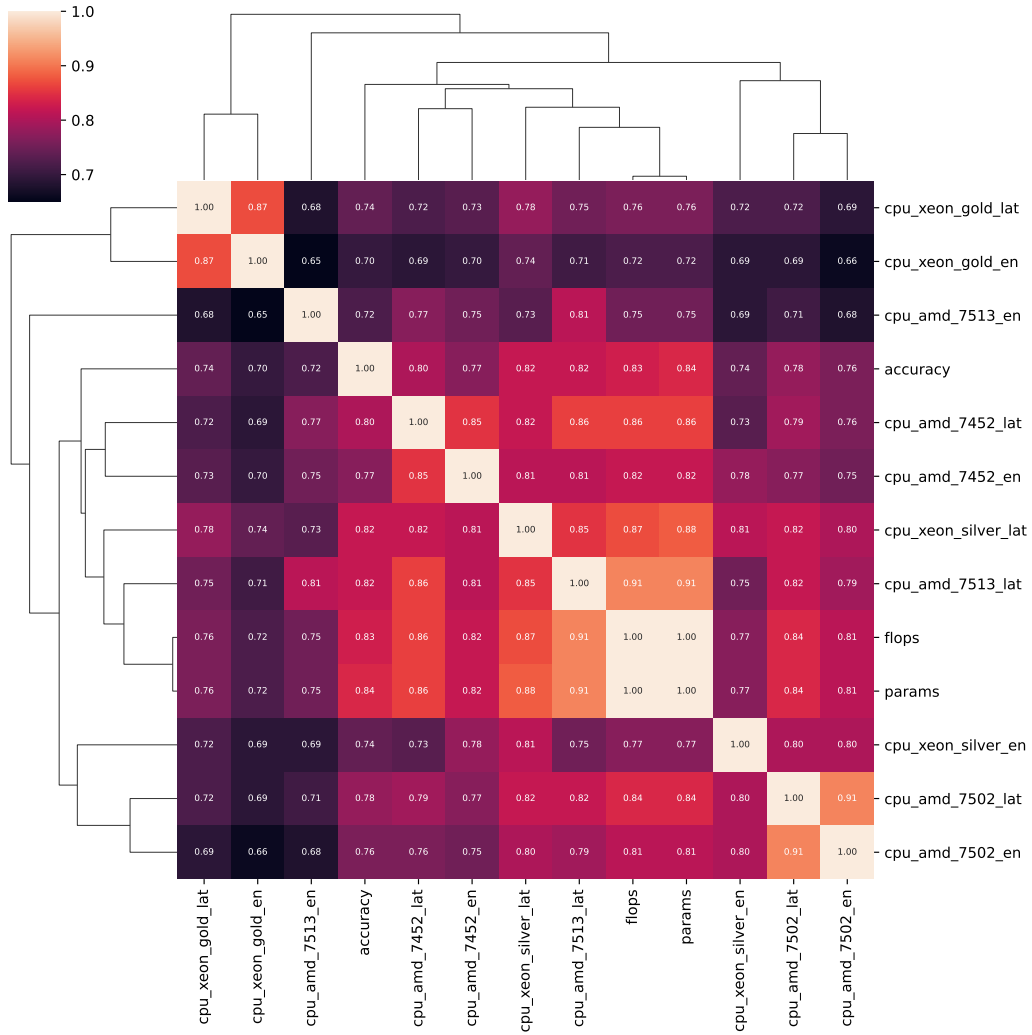

Figure 67: Cross-metric Kendall- $\tau$  correlation plots for GPT-L (only CPU device).

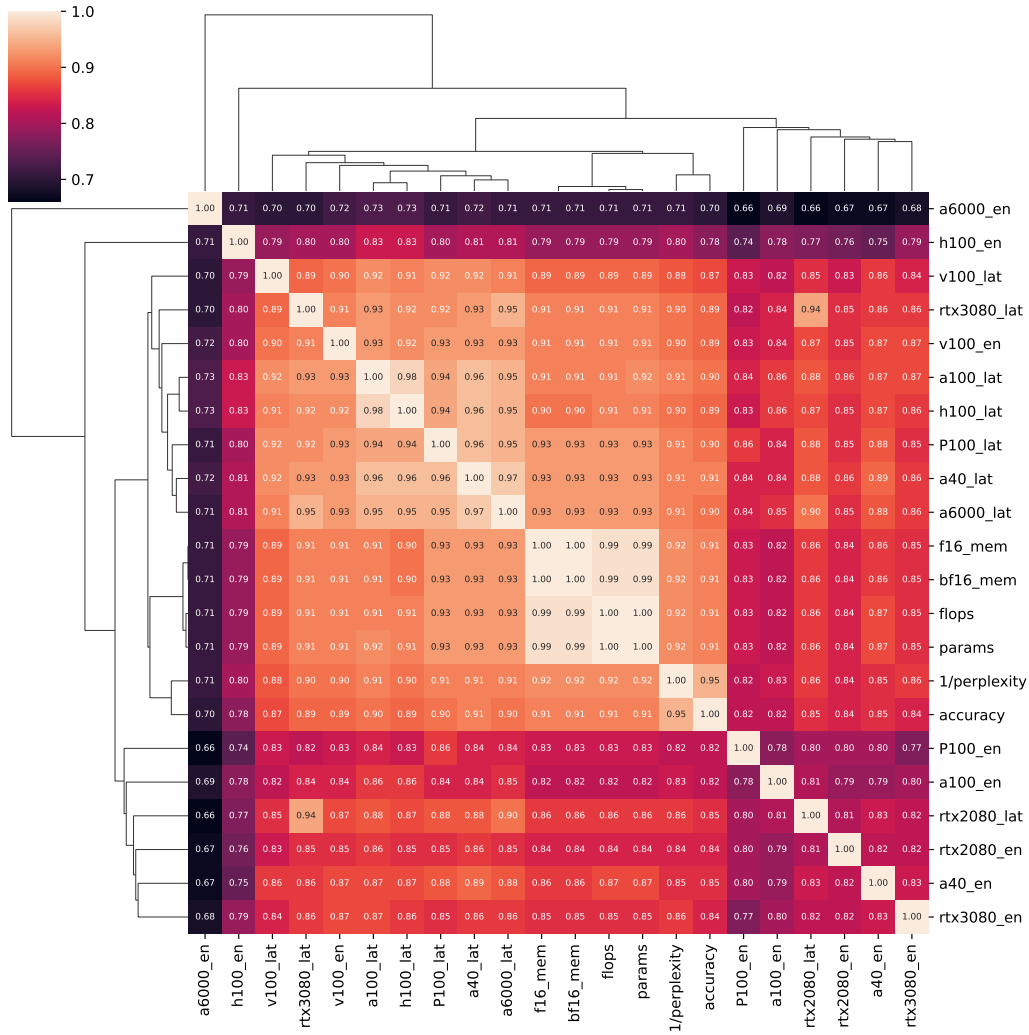

Figure 68: Cross-metric Kendall- $\tau$  correlation plots for GPT-S (only GPU devices).



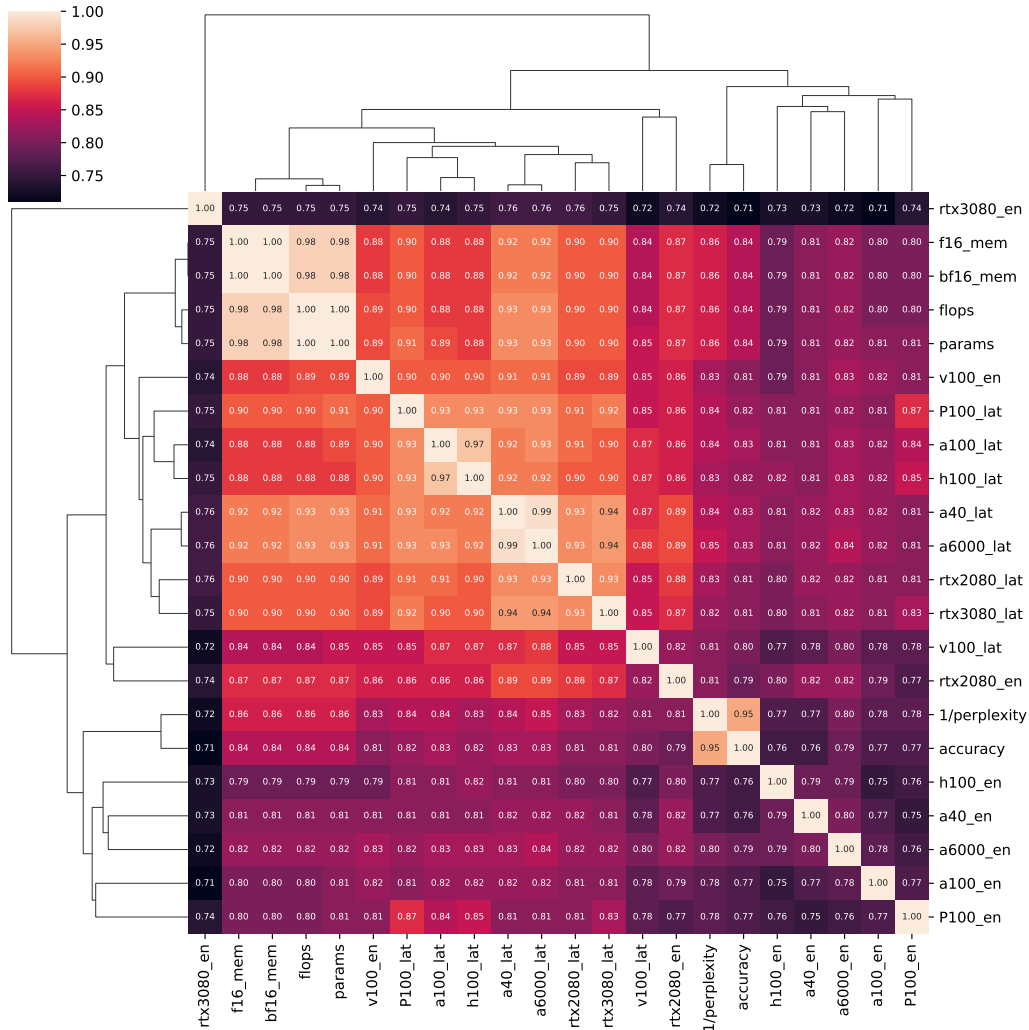

Figure 69: Cross-metric Kendall- $\tau$  correlation plots for GPT-M (only GPU devices).

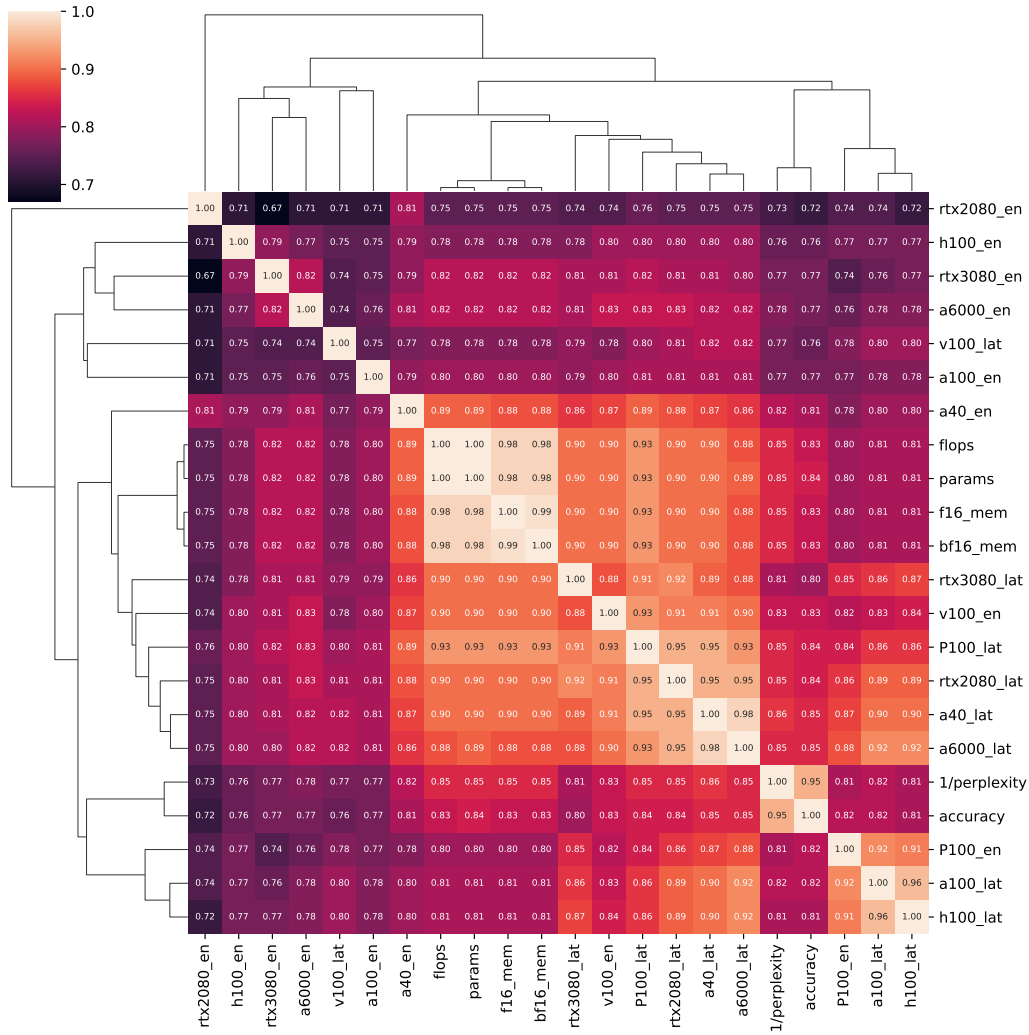

Figure 70: Cross-metric Kendall- $\tau$  correlation plots for GPT-L (only GPU devices).

## N Additional ECDF plots

In this section, we present the ECDF plots of perplexity on different search space scales, computed using the 10k ground truth observations from the supernet. The largest set,  $C$ , contains all architectures for a fixed embedding dimension size.  $B$ , a subset of  $C$ , contains all architectures that, in addition to the fixed embedding dimension  $e$ , have the number of layers set to the largest possible value  $l = l_3$ , namely 12, 24, and 36 for GPT-S, -M and -L, respectively.  $A$ , a subset of  $B$ , contains all architectures that, in addition to the number of layers set to largest possible values, have the average MLP ratio and number of heads greater than a fixed threshold. We show results for all 3 Transformer scales: GPT-S, -M and -L, in Figures 71, 72 and 73, respectively.

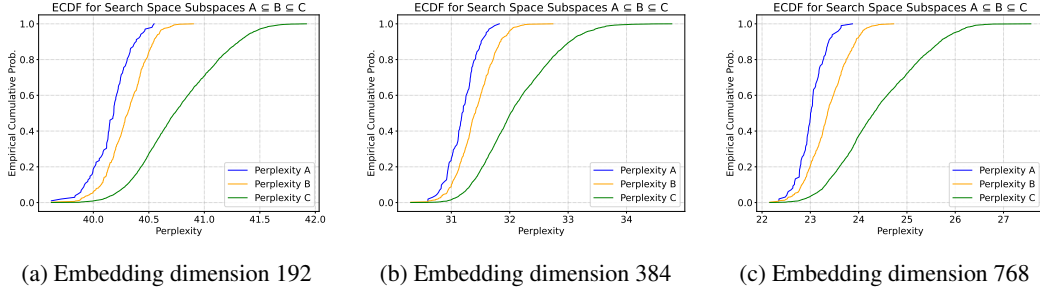

Figure 71: ECDF plots for GPT-S.

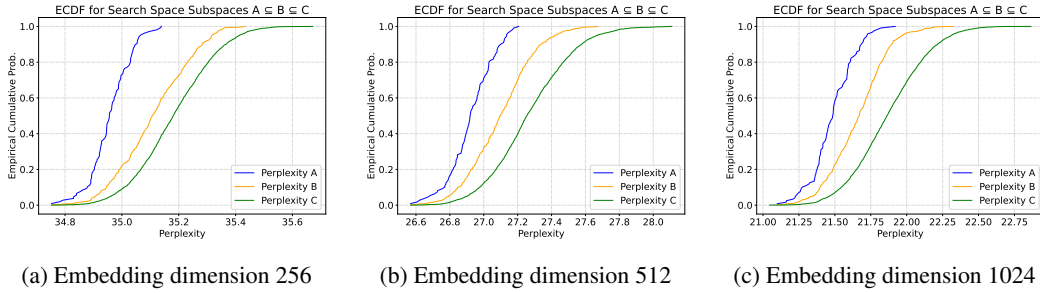

Figure 72: ECDF plots for GPT-M.

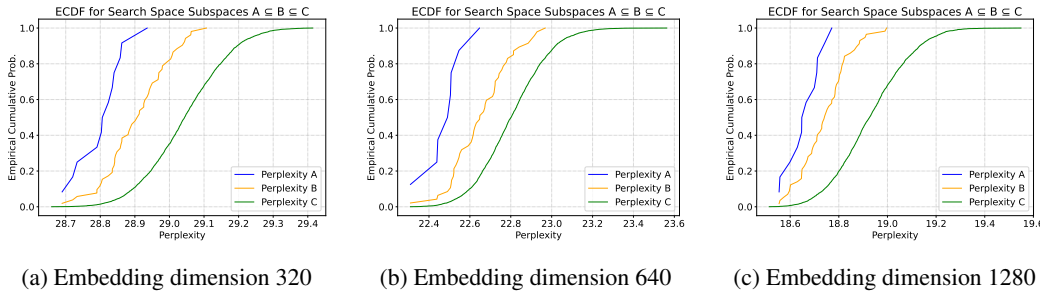

Figure 73: ECDF plots for GPT-L.

## O HW-GPT-Bench API Examples

```

from hwgpt.api import HWGPT
api = HWGPT(search_space="m") # initialize API for GPT-M
random_arch = api.sample_arch() # sample random arch
api.set_arch(random_arch) # set arch
flops = api.query(metric="flops") # query flops for the architecture
params = api.query(metric="params") # query params for the architecture
float16_memory = api.query(metric="f16mem") # query float16 memory for the architecture
bfloat16_memory = api.query(metric="bf16mem") # query bfloat16 memory for the architecture

```

Snippet 2: Hardware agnostic metric using the HW-GPT-Bench API.

```

from hwgpt.api import HWGPT
api = HWGPT(search_space="m") # initialize API for GPT-M
random_arch = api.sample_arch_gt() # sample random arch from amongst the 10k ground truth archs
api.set_arch(random_arch) # set arch
results = api.query(gt=True) # get all ground truth results for the architecture
energy = api.query(metric="energy",gt=True) # get ground truth energy observations for all
architectures
rtx2080 = api.query(device="rtx2080",gt=True) # get all hw metrics for rtx2080 device

```

Snippet 3: Ground truth observations using the HW-GPT-Bench API.

```

from hwgpt.api import HWGPT
api = HWGPT(search_space="m") # initialize API for GPT-M
nsga2_results_2d = api.run_baseline(method="nsga2", device="h100", metrics=["energy","perplexity"],
    ppl_predictor="mlp") # nsga-2d
nsga2_results_3d = api.run_baseline_3d(method="nsga2", device="h100", metrics=["energy","perplexity","
    latency"],ppl_predictor="mlp") #nsga-3d

```

Snippet 4: Running MOO with 3 objectives using the HW-GPT-Bench API.

## P HW-GPT-Bench Release and Maintainance

HW-GPT-Bench will be distributed under the Apache 2.0 License, tailored explicitly for academic research. The Apache 2.0 License is chosen for its permissive characteristics within the open-source community, permitting users to freely utilize, modify, and distribute the software under the condition of proper attribution and adherence to Apache 2.0 stipulations. This licensing strategy is pivotal in fostering broad adoption of HW-GPT-Bench.

In addition to its release, we are committed to fostering community engagement with the benchmark. We will actively monitor and respond to inquiries, issues, and suggestions related to HW-GPT-Bench, thereby cultivating a collaborative environment conducive to ongoing improvement and innovation.

Looking forward, our development roadmap includes plans to expand HW-GPT-Bench to encompass a wider range of devices and language model spaces. This expansion aims to bolster the benchmark’s utility and relevance, accommodating emerging research demands and technological advancements in the field

## Q Limitations and Future Work

While our work is the first one to efficiently benchmark different decoder-only architectures on a variety of gpu and cpu devices, there are several possible enhancements possible, which we leave to future work. Firstly, currently the benchmark is limited to decoder only models and we believe it would be interesting to extend to encoder-decoder models and state-space models. Secondly, currently the benchmark trains supernet networks from scratch and scaling to very large models (eg: Llama 3.1 405b), would require expensive retraining. Initializing from pretrained models and exploring parameter-efficient finetuning methods for supernet finetuning, is important to avoid retraining and make most efficient use of available compute. Furthermore, since the benchmark is developed primarily in an academic setting, we couldn’t profile the architectures on edge devices and specifically edge devices which are optimized for LLM inference. However, provide a plug and play framework by releasing all our profiling scripts and hope for community contributions to enhance the benchmark for newer hardware devices.

## NeurIPS Paper Checklist

### 1. Claims

Question: Do the main claims made in the abstract and introduction accurately reflect the paper's contributions and scope?

Answer: [Yes]

Justification: The claims made in the abstract and intro accurately reflect the contributions and scope of our paper

Guidelines:

- The answer NA means that the abstract and introduction do not include the claims made in the paper.
- The abstract and/or introduction should clearly state the claims made, including the contributions made in the paper and important assumptions and limitations. A No or NA answer to this question will not be perceived well by the reviewers.
- The claims made should match theoretical and experimental results, and reflect how much the results can be expected to generalize to other settings.
- It is fine to include aspirational goals as motivation as long as it is clear that these goals are not attained by the paper.

### 2. Limitations

Question: Does the paper discuss the limitations of the work performed by the authors?

Answer: [Yes]

Justification: We discuss the potential limitations and broader impact of our work.

Guidelines:

- The answer NA means that the paper has no limitation while the answer No means that the paper has limitations, but those are not discussed in the paper.
- The authors are encouraged to create a separate "Limitations" section in their paper.
- The paper should point out any strong assumptions and how robust the results are to violations of these assumptions (e.g., independence assumptions, noiseless settings, model well-specification, asymptotic approximations only holding locally). The authors should reflect on how these assumptions might be violated in practice and what the implications would be.
- The authors should reflect on the scope of the claims made, e.g., if the approach was only tested on a few datasets or with a few runs. In general, empirical results often depend on implicit assumptions, which should be articulated.
- The authors should reflect on the factors that influence the performance of the approach. For example, a facial recognition algorithm may perform poorly when image resolution is low or images are taken in low lighting. Or a speech-to-text system might not be used reliably to provide closed captions for online lectures because it fails to handle technical jargon.
- The authors should discuss the computational efficiency of the proposed algorithms and how they scale with dataset size.
- If applicable, the authors should discuss possible limitations of their approach to address problems of privacy and fairness.
- While the authors might fear that complete honesty about limitations might be used by reviewers as grounds for rejection, a worse outcome might be that reviewers discover limitations that aren't acknowledged in the paper. The authors should use their best judgment and recognize that individual actions in favor of transparency play an important role in developing norms that preserve the integrity of the community. Reviewers will be specifically instructed to not penalize honesty concerning limitations.

### 3. Theory Assumptions and Proofs

Question: For each theoretical result, does the paper provide the full set of assumptions and a complete (and correct) proof?

Answer: [NA]

Justification: We do not present any theoretical results in our paper.

Guidelines:

- The answer NA means that the paper does not include theoretical results.
- All the theorems, formulas, and proofs in the paper should be numbered and cross-referenced.
- All assumptions should be clearly stated or referenced in the statement of any theorems.
- The proofs can either appear in the main paper or the supplemental material, but if they appear in the supplemental material, the authors are encouraged to provide a short proof sketch to provide intuition.
- Inversely, any informal proof provided in the core of the paper should be complemented by formal proofs provided in appendix or supplemental material.
- Theorems and Lemmas that the proof relies upon should be properly referenced.

#### 4. Experimental Result Reproducibility

Question: Does the paper fully disclose all the information needed to reproduce the main experimental results of the paper to the extent that it affects the main claims and/or conclusions of the paper (regardless of whether the code and data are provided or not)?

Answer: [Yes]

Justification: We release the hyperparameters used in our paper, our code, raw datasets, pretrained models and an open-source api to ensure our benchmark results are reproducible.

Guidelines:

- The answer NA means that the paper does not include experiments.
- If the paper includes experiments, a No answer to this question will not be perceived well by the reviewers: Making the paper reproducible is important, regardless of whether the code and data are provided or not.
- If the contribution is a dataset and/or model, the authors should describe the steps taken to make their results reproducible or verifiable.
- Depending on the contribution, reproducibility can be accomplished in various ways. For example, if the contribution is a novel architecture, describing the architecture fully might suffice, or if the contribution is a specific model and empirical evaluation, it may be necessary to either make it possible for others to replicate the model with the same dataset, or provide access to the model. In general, releasing code and data is often one good way to accomplish this, but reproducibility can also be provided via detailed instructions for how to replicate the results, access to a hosted model (e.g., in the case of a large language model), releasing of a model checkpoint, or other means that are appropriate to the research performed.
- While NeurIPS does not require releasing code, the conference does require all submissions to provide some reasonable avenue for reproducibility, which may depend on the nature of the contribution. For example
  - (a) If the contribution is primarily a new algorithm, the paper should make it clear how to reproduce that algorithm.
  - (b) If the contribution is primarily a new model architecture, the paper should describe the architecture clearly and fully.
  - (c) If the contribution is a new model (e.g., a large language model), then there should either be a way to access this model for reproducing the results or a way to reproduce the model (e.g., with an open-source dataset or instructions for how to construct the dataset).
  - (d) We recognize that reproducibility may be tricky in some cases, in which case authors are welcome to describe the particular way they provide for reproducibility. In the case of closed-source models, it may be that access to the model is limited in some way (e.g., to registered users), but it should be possible for other researchers to have some path to reproducing or verifying the results.

#### 5. Open access to data and code

Question: Does the paper provide open access to the data and code, with sufficient instructions to faithfully reproduce the main experimental results, as described in supplemental material?

Answer: [Yes]

Justification: We release our code, the hyperparameters used and pretrained model checkpoints, raw result files etc.

Guidelines:

- The answer NA means that paper does not include experiments requiring code.
- Please see the NeurIPS code and data submission guidelines (<https://nips.cc/public/guides/CodeSubmissionPolicy>) for more details.
- While we encourage the release of code and data, we understand that this might not be possible, so “No” is an acceptable answer. Papers cannot be rejected simply for not including code, unless this is central to the contribution (e.g., for a new open-source benchmark).
- The instructions should contain the exact command and environment needed to run to reproduce the results. See the NeurIPS code and data submission guidelines (<https://nips.cc/public/guides/CodeSubmissionPolicy>) for more details.
- The authors should provide instructions on data access and preparation, including how to access the raw data, preprocessed data, intermediate data, and generated data, etc.
- The authors should provide scripts to reproduce all experimental results for the new proposed method and baselines. If only a subset of experiments are reproducible, they should state which ones are omitted from the script and why.
- At submission time, to preserve anonymity, the authors should release anonymized versions (if applicable).
- Providing as much information as possible in supplemental material (appended to the paper) is recommended, but including URLs to data and code is permitted.

## 6. Experimental Setting/Details

Question: Does the paper specify all the training and test details (e.g., data splits, hyperparameters, how they were chosen, type of optimizer, etc.) necessary to understand the results?

Answer: [Yes]

Justification: In our code and in the appendix of the paper we present the dataset splits used, the hyperparameters used.

Guidelines:

- The answer NA means that the paper does not include experiments.
- The experimental setting should be presented in the core of the paper to a level of detail that is necessary to appreciate the results and make sense of them.
- The full details can be provided either with the code, in appendix, or as supplemental material.

## 7. Experiment Statistical Significance

Question: Does the paper report error bars suitably and correctly defined or other appropriate information about the statistical significance of the experiments?

Answer: [Yes]

Justification: We perform latency and energy profiling across multiple evaluations, but surrogates which incorporate uncertainties directly. We also perform search using the baselines on our benchmark on multiple seeds.

Guidelines:

- The answer NA means that the paper does not include experiments.
- The authors should answer "Yes" if the results are accompanied by error bars, confidence intervals, or statistical significance tests, at least for the experiments that support the main claims of the paper.
- The factors of variability that the error bars are capturing should be clearly stated (for example, train/test split, initialization, random drawing of some parameter, or overall run with given experimental conditions).

- The method for calculating the error bars should be explained (closed form formula, call to a library function, bootstrap, etc.)
- The assumptions made should be given (e.g., Normally distributed errors).
- It should be clear whether the error bar is the standard deviation or the standard error of the mean.
- It is OK to report 1-sigma error bars, but one should state it. The authors should preferably report a 2-sigma error bar than state that they have a 96% CI, if the hypothesis of Normality of errors is not verified.
- For asymmetric distributions, the authors should be careful not to show in tables or figures symmetric error bars that would yield results that are out of range (e.g. negative error rates).
- If error bars are reported in tables or plots, The authors should explain in the text how they were calculated and reference the corresponding figures or tables in the text.

## 8. Experiments Compute Resources

Question: For each experiment, does the paper provide sufficient information on the computer resources (type of compute workers, memory, time of execution) needed to reproduce the experiments?

Answer: [Yes]

Justification: Yes we provide details on the hardware used and a detailed table with search times in the appendix of the paper.

Guidelines:

- The answer NA means that the paper does not include experiments.
- The paper should indicate the type of compute workers CPU or GPU, internal cluster, or cloud provider, including relevant memory and storage.
- The paper should provide the amount of compute required for each of the individual experimental runs as well as estimate the total compute.
- The paper should disclose whether the full research project required more compute than the experiments reported in the paper (e.g., preliminary or failed experiments that didn't make it into the paper).

## 9. Code Of Ethics

Question: Does the research conducted in the paper conform, in every respect, with the NeurIPS Code of Ethics <https://neurips.cc/public/EthicsGuidelines>?

Answer: [Yes]

Justification: Our research conforms to the NeurIPS Code of Ethics and we make sure to preserve the anonymity of our submission.

Guidelines:

- The answer NA means that the authors have not reviewed the NeurIPS Code of Ethics.
- If the authors answer No, they should explain the special circumstances that require a deviation from the Code of Ethics.
- The authors should make sure to preserve anonymity (e.g., if there is a special consideration due to laws or regulations in their jurisdiction).

## 10. Broader Impacts

Question: Does the paper discuss both potential positive societal impacts and negative societal impacts of the work performed?

Answer: [Yes]

Justification: Yes, we discuss the potential positive and negative impacts of the work in the "Conclusions, Broader Impact and Implications" section 6.

Guidelines:

- The answer NA means that there is no societal impact of the work performed.
- If the authors answer NA or No, they should explain why their work has no societal impact or why the paper does not address societal impact.



- Examples of negative societal impacts include potential malicious or unintended uses (e.g., disinformation, generating fake profiles, surveillance), fairness considerations (e.g., deployment of technologies that could make decisions that unfairly impact specific groups), privacy considerations, and security considerations.
- The conference expects that many papers will be foundational research and not tied to particular applications, let alone deployments. However, if there is a direct path to any negative applications, the authors should point it out. For example, it is legitimate to point out that an improvement in the quality of generative models could be used to generate deepfakes for disinformation. On the other hand, it is not needed to point out that a generic algorithm for optimizing neural networks could enable people to train models that generate Deepfakes faster.
- The authors should consider possible harms that could arise when the technology is being used as intended and functioning correctly, harms that could arise when the technology is being used as intended but gives incorrect results, and harms following from (intentional or unintentional) misuse of the technology.
- If there are negative societal impacts, the authors could also discuss possible mitigation strategies (e.g., gated release of models, providing defenses in addition to attacks, mechanisms for monitoring misuse, mechanisms to monitor how a system learns from feedback over time, improving the efficiency and accessibility of ML).

#### 11. Safeguards

Question: Does the paper describe safeguards that have been put in place for responsible release of data or models that have a high risk for misuse (e.g., pretrained language models, image generators, or scraped datasets)?

Answer: [\[Yes\]](#)

Justification: We use and release datasets which are open-source and released under the Apache 2.0 license. These models are trained on open-source datasets and we intend the use of these models only for research purposes.

Guidelines:

- The answer NA means that the paper poses no such risks.
- Released models that have a high risk for misuse or dual-use should be released with necessary safeguards to allow for controlled use of the model, for example by requiring that users adhere to usage guidelines or restrictions to access the model or implementing safety filters.
- Datasets that have been scraped from the Internet could pose safety risks. The authors should describe how they avoided releasing unsafe images.
- We recognize that providing effective safeguards is challenging, and many papers do not require this, but we encourage authors to take this into account and make a best faith effort.

#### 12. Licenses for existing assets

Question: Are the creators or original owners of assets (e.g., code, data, models), used in the paper, properly credited and are the license and terms of use explicitly mentioned and properly respected?

Answer: [\[Yes\]](#)

Justification: We release our own code and cite appropriately in cases where we use code and pretrained models from other repositories.

Guidelines:

- The answer NA means that the paper does not use existing assets.
- The authors should cite the original paper that produced the code package or dataset.
- The authors should state which version of the asset is used and, if possible, include a URL.
- The name of the license (e.g., CC-BY 4.0) should be included for each asset.
- For scraped data from a particular source (e.g., website), the copyright and terms of service of that source should be provided.

- If assets are released, the license, copyright information, and terms of use in the package should be provided. For popular datasets, [paperswithcode.com/datasets](https://paperswithcode.com/datasets) has curated licenses for some datasets. Their licensing guide can help determine the license of a dataset.
- For existing datasets that are re-packaged, both the original license and the license of the derived asset (if it has changed) should be provided.
- If this information is not available online, the authors are encouraged to reach out to the asset's creators.

### 13. **New Assets**

Question: Are new assets introduced in the paper well documented and is the documentation provided alongside the assets?

Answer: [Yes]

Justification: Yes we release our code and models under the Apache 2.0 license and our code and models are well documented.

Guidelines:

- The answer NA means that the paper does not release new assets.
- Researchers should communicate the details of the dataset/code/model as part of their submissions via structured templates. This includes details about training, license, limitations, etc.
- The paper should discuss whether and how consent was obtained from people whose asset is used.
- At submission time, remember to anonymize your assets (if applicable). You can either create an anonymized URL or include an anonymized zip file.

### 14. **Crowdsourcing and Research with Human Subjects**

Question: For crowdsourcing experiments and research with human subjects, does the paper include the full text of instructions given to participants and screenshots, if applicable, as well as details about compensation (if any)?

Answer: [NA]

Justification: Our research is not dependent on/based on human subjects.

Guidelines:

- The answer NA means that the paper does not involve crowdsourcing nor research with human subjects.
- Including this information in the supplemental material is fine, but if the main contribution of the paper involves human subjects, then as much detail as possible should be included in the main paper.
- According to the NeurIPS Code of Ethics, workers involved in data collection, curation, or other labor should be paid at least the minimum wage in the country of the data collector.

### 15. **Institutional Review Board (IRB) Approvals or Equivalent for Research with Human Subjects**

Question: Does the paper describe potential risks incurred by study participants, whether such risks were disclosed to the subjects, and whether Institutional Review Board (IRB) approvals (or an equivalent approval/review based on the requirements of your country or institution) were obtained?

Answer: [NA]

Justification: We do not collect data on human subjects for our research.

Guidelines:

- The answer NA means that the paper does not involve crowdsourcing nor research with human subjects.
- Depending on the country in which research is conducted, IRB approval (or equivalent) may be required for any human subjects research. If you obtained IRB approval, you should clearly state this in the paper.

- We recognize that the procedures for this may vary significantly between institutions and locations, and we expect authors to adhere to the NeurIPS Code of Ethics and the guidelines for their institution.
- For initial submissions, do not include any information that would break anonymity (if applicable), such as the institution conducting the review.
